# Supplementary material for: Environmental Profile of a Novel High-Amylose Bread Wheat Fresh Pasta with Low Glycemic Index
Source: MDPI journal article supplement (doi:10.3390/foods11203199), 2022-10-13
Supplement: s1 [file s1]

## SUPPLEMENTARY MATERIAL

**Table S1.** Description of the six product stages involved in the fresh pasta life cycle network according to the Simapro software used in this work.

| Product stage        | Name                                                                     | Main output        | Unit | Reference Table |
|----------------------|--------------------------------------------------------------------------|--------------------|------|-----------------|
| Process              | High-amylose soft wheat cultivation                                      | HABW grain         | kg   | Table S3        |
| Process              | 25-kg paper bag production                                               | SAF                | kg   | Table S5        |
| Process              | High-amylose bread wheat milling                                         | HABW flour         | kg   | Table S6        |
| Process              | High-amylose soft bread pasta production                                 | Fresh pasta        | kg   | Table S7        |
| Process              | PE bag production                                                        | PE bags            | kg   | Table S9        |
| Process              | Adhesive paper label production                                          | Paper labels       | kg   | Table S10       |
| Process              | Carton production                                                        | Cartons            | kg   | Table S11       |
| Process              | Scotch tape production                                                   | Scotch tape        | kg   | Table S12       |
| Process              | EPAL wood pallet production                                              | Wood pallet        | kg   | Table S13       |
| Process              | Shrink & shrank PE film production                                       | PE film            | kg   | Table S14       |
| Assembly             | Assembly of the primary packaging for fresh pasta                        | Ass 1pack          | p    | Table S15       |
| Assembly             | Assembly of the secondary packaging for fresh pasta                      | Ass 2pack          | p    | Table S16       |
| Assembly             | Assembly of the tertiary packaging for fresh pasta                       | Ass 3pack          | p    | Table S17       |
| Assembly             | Assembly of the primary and secondary packages for fresh pasta           | Ass 1-2pack        | p    | Table S18       |
| Assembly             | Assembly of the primary, secondary and tertiary packages for fresh pasta | Ass 1-3pack        | p    | Table S19       |
| Assembly             | Assembly of fresh pasta                                                  | Ass pasta          | p    | Table S20       |
| Processes            | Use phase                                                                | Cooked fresh pasta | kg   | Table S21       |
| Waste scenario       | Waste scenario of plastic packaging wastes                               | PW                 | kg   | Table S22       |
| Waste scenario       | Waste scenario of paper and cardboard packaging wastes                   | PCW                | kg   | Table S23       |
| Waste scenario       | Waste scenario of wooden pallet wastes                                   | PALW               | kg   | Table S24       |
| End of life scenario | End of life scenario of the primary packaging material wastes            | EoL-1pack          | -    | Table S25       |
| End of life scenario | End of life scenario of the secondary packaging material wastes          | EoL-2pack          | -    | Table S26       |
| End of life scenario | End of life of the tertiary packaging wastes                             | EoL-3pack          | -    | Table S27       |
| End of life scenario | End of life scenario of the I, II, and III packaging material wastes     | EoL-1-3pack        | -    | Table S28       |
| Reuse                | Reuse of the wooden pallet                                               | Pallet reuse       | p    | Table S29       |
| Life cycle           | Life cycle of fresh pasta                                                | LC-FP              | p    | Table S30       |
| Life cycle           | Life cycle of the primary, secondary and tertiary packaging materials    | LC1-3pack          | p    | Table S31       |
| Life cycle           | Life cycle of the wooden pallet                                          | LC-3pack           | p    | Table S32       |

**Table S2** Input/output data for the conventional production of high-amylose bread wheat at the Massimo Filzi farm (Anguillara Sabazia, Italy), as referred to a nominal land area of 1 ha. All emission factors were extracted from the recently updated IPCC Guidelines [39].

| Input/Output Parameter                                                                                                                             | Unit                                                                                             | Amount             |
|----------------------------------------------------------------------------------------------------------------------------------------------------|--------------------------------------------------------------------------------------------------|--------------------|
| Nominal non-irrigated land used ( $A_C$ )                                                                                                          | ha                                                                                               | 1.0                |
| Land used to cultivate HASW                                                                                                                        | %                                                                                                | 100                |
| Set-aside land                                                                                                                                     | %                                                                                                | 0                  |
| HASW seed density                                                                                                                                  | $\text{kg} \cdot \text{ha}^{-1}$                                                                 | 250                |
| Distance travelled by seeds (Viterbo-Anguillara Sabazia, Italy)                                                                                    | km                                                                                               | 62                 |
| <i>Input</i>                                                                                                                                       |                                                                                                  |                    |
| Overall synthetic nitrogen supplied ( $F_S$ )                                                                                                      | $\text{kg N a}^{-1}$                                                                             | 144                |
| <i>Output</i>                                                                                                                                      |                                                                                                  |                    |
| Crop yield                                                                                                                                         | $\text{Mg} \cdot \text{ha}^{-1} \cdot \text{a}^{-1}$                                             | 1.5                |
| Average grain moisture                                                                                                                             | $\text{g} \cdot \text{kg}^{-1}$                                                                  | 110                |
| Dry grain yield                                                                                                                                    | $\text{kg}_{\text{DM}} \cdot \text{ha}^{-1} \cdot \text{a}^{-1}$                                 | 1335               |
| Above ground residues ( $\text{AG}_{\text{DM}}$ )                                                                                                  | $\text{Mg}_{\text{DM}} \cdot \text{ha}^{-1} \cdot \text{a}^{-1}$                                 | 2.55               |
| N content of above-ground residues                                                                                                                 | $\text{kg N} \cdot (\text{kg}_{\text{DM}})^{-1}$                                                 | 0.006              |
| - Percentage of straw left in the field                                                                                                            | %                                                                                                | 0                  |
| - Percentage of straw incinerated                                                                                                                  | %                                                                                                | 0                  |
| - Percentage of straw baling                                                                                                                       | %                                                                                                | 100                |
| Above ground biomass (AGR)                                                                                                                         | $(\text{kg}_{\text{DM}}) \text{ha}^{-1} \text{a}^{-1}$                                           | 2549               |
| Below ground-to-above ground biomass ratio ( $R_{\text{BG-BIO}}$ )                                                                                 | $\text{kg} \cdot \text{kg}^{-1}$                                                                 | 0.23               |
| Below ground residues ( $\text{BG}_{\text{DM}}$ )                                                                                                  | $\text{kg}_{\text{DM}} \cdot \text{ha}^{-1} \cdot \text{a}^{-1}$                                 | 893                |
| N content of below-ground residues                                                                                                                 | $\text{kg N} \cdot (\text{kg}_{\text{DM}})^{-1}$                                                 | 0.009              |
| Nitrogen in crop residues ( $F_{\text{CR}}$ )                                                                                                      | $\text{kg N} \cdot \text{ha}^{-1} \cdot \text{a}^{-1}$                                           | 8.04               |
| N emissions as $\text{NH}_3$ -ed $\text{NO}_x$ ( $\text{Frac}_{\text{GASF}}$ )                                                                     | $\text{kg NH}_3\text{-N} + \text{NO}_x\text{-N} \cdot (\text{kg N})^{-1}$                        | 0.11 (0.02-0.33)   |
| N leaching off ( $\text{Frac}_{\text{LEACH}}$ )                                                                                                    | $\text{kg N} \cdot (\text{kg N})^{-1}$                                                           | 0.24 (0.01-0.73)   |
| $\text{N}_2\text{O}$ -N emissions per unit mass of N fertilizer ( $\text{EF}_1$ )                                                                  | $\text{kg N}_2\text{O-N} \cdot (\text{kg N})^{-1}$                                               | 0.01 (0.001-0.018) |
| $\text{N}_2\text{O}$ -N emissions per unit mass of $\text{NH}_3$ and $\text{NO}_x$ emitted ( $\text{EF}_4$ )                                       | $\text{kg N}_2\text{O-N} \cdot (\text{kg NH}_3\text{-N} + \text{kg NO}_x\text{-N emitted})^{-1}$ | 0.01 (0.002-0.018) |
| $\text{N}_2\text{O}$ -N emissions per unit mass of N leached off ( $\text{EF}_5$ )                                                                 | $\text{kg N}_2\text{O-N} \cdot (\text{kg N leached off})^{-1}$                                   | 0.011 (0.0-0.020)  |
| Direct $\text{N}_2\text{O}$ emissions [ $=(F_S + F_{\text{CR}}) \cdot \text{EF}_1 \cdot 44/28$ ]                                                   | $\text{kg N}_2\text{O ha}^{-1} \text{yr}^{-1}$                                                   | 2.389              |
| Indirect $\text{N}_2\text{O}$ emissions from $\text{NH}_3$ e $\text{NO}_x$ [ $=F_S \text{ Frac}_{\text{GASF}} \cdot \text{EF}_4 \cdot 44/28$ ]     | $\text{kg N}_2\text{O ha}^{-1} \text{yr}^{-1}$                                                   | 0.249              |
| Indirect $\text{N}_2\text{O}$ emissions from N leaching off [ $=(F_S + F_{\text{CR}}) \text{ Frac}_{\text{LEACH}} \cdot \text{EF}_5 \cdot 44/28$ ] | $\text{kg N}_2\text{O} \cdot \text{ha}^{-1} \cdot \text{yr}^{-1}$                                | 0.631              |
| Direct and indirect $\text{N}_2\text{O}$ emissions                                                                                                 | $\text{kg N}_2\text{O} \cdot \text{ha}^{-1} \cdot \text{yr}^{-1}$                                | 3.269              |
| Urea emission factor ( $\text{EF}_{\text{UREA}}$ )                                                                                                 | $\text{kg C/kg Urea}$                                                                            | 0.2                |
| Reduction ( $\eta$ )                                                                                                                               | $\text{kg C/kg Urea}$                                                                            | 0.5                |
| $\text{CO}_2$ emissions from urea ( $F_{\text{CO}_2} = \text{Urea } A_C \text{ EF}_{\text{Urea}} \eta$ )                                           | $\text{kg CO}_{2\text{e}} \text{ha}^{-1} \text{yr}^{-1}$                                         | 55.00              |
| $\text{NO}$ emissions [40]                                                                                                                         | $\text{kg N ha}^{-1} \text{yr}^{-1}$                                                             | 2.142              |
| Nitrate emissions in water                                                                                                                         | $\text{kg NO}_3\text{-N ha}^{-1} \text{yr}^{-1}$                                                 | 36.49              |
| P emissions in water [0.05 kg P/ kg P applied]                                                                                                     | $\text{kg P ha}^{-1} \text{yr}^{-1}$                                                             | 2.01               |

**Table S3.** Inventory associated with the high-amylose bread wheat cultivation phase.

Inventory associated with the high amylose straw wheat cultivation phase:

| Products                                                                                                |  |                      |                |                              |              |              |                    |         |         |                                                      |
|---------------------------------------------------------------------------------------------------------|--|----------------------|----------------|------------------------------|--------------|--------------|--------------------|---------|---------|------------------------------------------------------|
| Outputs to technosphere: Products and co-products                                                       |  | Amount               | Unit           | Quantity                     | Allocation   | Waste type   | Category           | Comment |         |                                                      |
| FP-1 High Amylose Wheat Grain                                                                           |  | CropYield = 1.5E3    | kg             | Mass                         | 92.5 %       | Biopolymer   | A...Transformation |         |         |                                                      |
| STRAW                                                                                                   |  | STRAW/SSSTRAW = 2.92 | ton            | Mass                         | 7.5 %        | Biopolymer   | A...Transformation |         |         |                                                      |
| Add                                                                                                     |  |                      |                |                              |              |              |                    |         |         |                                                      |
| Outputs to technosphere: Avoided products                                                               |  | Amount               | Unit           | Distribution                 | SD2 or 2SD   | Min          | Max                | Comment |         |                                                      |
| Add                                                                                                     |  |                      |                |                              |              |              |                    |         |         |                                                      |
| Inputs                                                                                                  |  |                      |                |                              |              |              |                    |         |         |                                                      |
| Inputs from nature                                                                                      |  | Sub-compartment      | Amount         | Unit                         | Distribution | SD2 or 2SD   | Min                | Max     | Comment |                                                      |
| Occupation, annual crop, IT                                                                             |  |                      | AREA = 1       | ha a                         |              |              |                    |         |         |                                                      |
| Add                                                                                                     |  |                      |                |                              |              |              |                    |         |         |                                                      |
| Inputs from technosphere: materials/fuels                                                               |  |                      |                | Amount                       | Unit         | Distribution | SD2 or 2SD         | Min     | Max     | Comment                                              |
| Urea (RER)  urea production   Cut-off, S                                                                |  |                      |                | UREA*AREA = 150              | kg           |              |                    |         |         | See Table 1                                          |
| Diammonium phosphate (RER)  diammonium phosphate production   Cut-off, S                                |  |                      |                | FOSFBIAM*AREA = 200          | kg           |              |                    |         |         | "                                                    |
| Ammonium nitrate (RER)  ammonium nitrate production   Cut-off, S                                        |  |                      |                | NITRAMM*AREA = 150           | kg           |              |                    |         |         | "                                                    |
| Pesticide, unspecified (RER)  production   Cut-off, U                                                   |  |                      |                | 1.8*AREA = 1.8               | kg           |              |                    |         |         | Fungicide (1 L/ha) + Herbicide (0.8 L/ha)            |
| Diesel (Europe without Switzerland)  market for   Cut-off, S                                            |  |                      |                | 70*AREA = 70                 | kg           |              |                    |         |         | See Table 1                                          |
| Lubricating oil (RER)  market for lubricating oil   Cut-off, S                                          |  |                      |                | 0.2*AREA = 0.2               | kg           |              |                    |         |         | "                                                    |
| Wheat seed, for sowing (GLO)  production   Cut-off, S                                                   |  |                      |                | Seed*AREA = 250              | kg           |              |                    |         |         | "                                                    |
| Add                                                                                                     |  |                      |                |                              |              |              |                    |         |         |                                                      |
| Inputs from technosphere: electricity/heat                                                              |  |                      |                | Amount                       | Unit         | Distribution | SD2 or 2SD         | Min     | Max     | Comment                                              |
| Transport, freight, lorry 3.5-7.5 metric ton, EURO5 (RoW)  transport, freight, lorry 3.5-7.5 metric ton |  |                      |                | Seed*AREA*55 = 1.38E4        | kgkm         |              |                    |         |         | Transport seeds VT-Anguillara Sabazia: 55 km         |
| Transport, freight, lorry 7.5-16 metric ton, EURO5 (RER)  transport, freight, lorry 7.5-16 metric ton   |  |                      |                | (UREA+FOSFBIAM+NITRAMM)*4    | kgkm         |              |                    |         |         | TR fertilizers Varie-Anguillara Sabazia: 100 km      |
| Transport, freight, light commercial vehicle (Europe without Switzerland)  market for transport, 1      |  |                      |                | (1.8+70+0.2)*AREA*25 = 1.8E3 | kgkm         |              |                    |         |         | TR pest+diesel fuel+Lubr oil Varie-Angu. Sab.: 25 km |
| Transport, freight, lorry 7.5-16 metric ton, EURO5 (RER)  transport, freight, lorry 7.5-16 metric ton   |  |                      |                | STRAW/SSSTRAW*50 = 146       | tkm          |              |                    |         |         | TR Paglia Ang Sab-Varie: 50 km                       |
| Add                                                                                                     |  |                      |                |                              |              |              |                    |         |         |                                                      |
| Outputs                                                                                                 |  |                      |                |                              |              |              |                    |         |         |                                                      |
| Emissions to air                                                                                        |  | Sub-compartment      | Amount         | Unit                         | Distribution | SD2 or 2SD   | Min                | Max     | Comment |                                                      |
| Dinitrogen monoxide                                                                                     |  | low. pop., long-ter  | FN2OTOT = 3.27 | kg                           |              |              |                    |         |         |                                                      |
| Nitrogen monoxide, IT                                                                                   |  | low. pop., long-ter  | NOA = 4.59     | kg                           |              |              |                    |         |         |                                                      |
| Carbon dioxide, fossil                                                                                  |  | low. pop., long-ter  | CO2U = 55      | kg                           |              |              |                    |         |         |                                                      |
| Add                                                                                                     |  |                      |                |                              |              |              |                    |         |         |                                                      |
| Emissions to water                                                                                      |  | Sub-compartment      | Amount         | Unit                         | Distribution | SD2 or 2SD   | Min                | Max     | Comment |                                                      |
| Nitrate, IT                                                                                             |  | groundwater, long    | NITRL = 36.5   | kg                           |              |              |                    |         |         |                                                      |
| Phosphorus, IT                                                                                          |  | groundwater, long    | PLEACH = 2.01  | kg                           |              |              |                    |         |         |                                                      |

**Table S4** Total and partial material balances of the high-amylose bread wheat milling step in the pilot-scale mill with the pre-cleaning, cleaning, and grinding yields.

| Step       |        |       | Pre-cleaning |       |        | Cleaning |        | Tempering |        |       | Grinding |        |       |       |        | Pelletizing |         |       |
|------------|--------|-------|--------------|-------|--------|----------|--------|-----------|--------|-------|----------|--------|-------|-------|--------|-------------|---------|-------|
| Stream     | HASWG  |       | ISS          | TPP   | GPP    | TP       | GP     | TW        | GPU    |       | CR1      | CR2    | FGT   | WE    | HAWF   |             | WFP     |       |
|            | kg     | % p/p | kg           | kg    | kg     | kg       | kg     | kg        | kg     | % p/p | kg       | kg     | kg    | kg    | kg     | % p/p       | kg      | % p/p |
| Water      | 824.6  | 11    | 0.41         | 7.83  | 816.3  | 41.7     | 774.6  | 375.0     | 1149.6 | 15.5  | 68.0     | 216.5  | 126.2 | 223.0 | 515.9  | 12.88       | 460.29  | 12.6  |
| Dry matter | 6671.4 | 89    | 3.34         | 63.38 | 6604.7 | 337.4    | 6267.4 | 0.0       | 6267.4 | 84.5  | 460.0    | 1464.5 | 853.8 | 0.0   | 3489.1 | 87.12       | 3178.97 | 87.4  |
| Total      | 7496.0 | 100   | 3.75         | 71.21 | 7421.0 | 379.1    | 7042.0 | 375.0     | 7417.0 | 100.0 | 528.0    | 1681.0 | 980.0 | 223.0 | 4005.0 | 100.0       | 3639.27 | 100.0 |
| Yield (%)  |        |       | 0.05         | 0.95  | 99.00  | 5.11     | 94.89  | 5         | 105    |       | 7        | 23     | 13    | 3     | 54     |             | 49      |       |

**Table S5.** Total and partial material balances of the milling step of the HABW grains harvested from a nominal fertilized soil area of 1 ha. All symbols were listed in the Nomenclature section.

| Step       |       |       | Pre-cleaning |       |        | Cleaning |        | Tempering |         |       | Grinding |       |       |      |       | Pelletizing |        | Packaging |      |      |        |        |
|------------|-------|-------|--------------|-------|--------|----------|--------|-----------|---------|-------|----------|-------|-------|------|-------|-------------|--------|-----------|------|------|--------|--------|
| Stream     | HABWG |       | ISS          | TPP   | GPP    | TP       | GP     | TW        | GPU     |       | CR1      | CR2   | FGT   | WE   | HABWF | WFP         |        |           | SAF  | SSAF | HABWFS |        |
|            | kg    | % p/p | kg           | kg    | kg     | kg       | kg     | kg        | kg      | % p/p | kg       | kg    | kg    | kg   | kg    | % p/p       | kg     | % p/p     | no.  | kg   | kg     | kg     |
| Water      | 165   | 11    | 0.08         | 1.57  | 163.4  | 8.3      | 155.0  | 75        | 230.0   | 15.5  | 13.6     | 43.3  | 25.3  | 44.6 | 103.2 | 12.88       | 92.11  | 12.6      |      |      |        |        |
| Dry matter | 1335  | 89    | 0.67         | 12.68 | 1321.7 | 67.5     | 1254.1 | 0         | 1254.1  | 84.5  | 92.0     | 293.1 | 170.8 | 0    | 698.2 | 87.12       | 636.13 | 87.4      |      |      |        |        |
| Total      | 1500  | 100   | 0.75         | 14.25 | 1485.0 | 75.9     | 1409.1 | 75        | 1484.19 | 100.0 | 105.7    | 336.4 | 196.1 | 44.6 | 801.4 | 100.00      | 728.24 | 100.0     | 32.1 | 3.72 | 0.04   | 805.11 |

**Table S6.** Inventory associated with the production of 25-kg paper bags.

Table 15.6: Inventory associated with the production of 25 kg paper bag.

| Products                                                                                             |                 |        |              |              |            |                     |         |         |                                                       |
|------------------------------------------------------------------------------------------------------|-----------------|--------|--------------|--------------|------------|---------------------|---------|---------|-------------------------------------------------------|
| Outputs to technosphere: Products and co-products                                                    | Amount          | Unit   | Quantity     | Allocatio    | Waste type | Category            | Comment |         |                                                       |
| FP-1 bis paper bags x flour                                                                          | 1               | kg     | Mass         | 100 %        | Paper      | P...\Transformation |         |         |                                                       |
| Add                                                                                                  |                 |        |              |              |            |                     |         |         |                                                       |
| Outputs to technosphere: Avoided products                                                            | Amount          | Unit   | Distribution | SD2 or 2SD   | Min        | Max                 | Comment |         |                                                       |
| Add                                                                                                  |                 |        |              |              |            |                     |         |         |                                                       |
| Inputs                                                                                               |                 |        |              |              |            |                     |         |         |                                                       |
| Inputs from nature                                                                                   | Sub-compartment | Amount | Unit         | Distribution | SD2 or 2SD | Min                 | Max     | Comment |                                                       |
| Add                                                                                                  |                 |        |              |              |            |                     |         |         |                                                       |
| Inputs from technosphere: materials/fuels                                                            |                 |        | Amount       | Unit         | Distrib    | SD2 <               | Min     | Max     | Comment                                               |
| Paper sack (RER)  market for paper sack   Cut-off, S                                                 |                 |        | 1            | kg           | Unde       |                     |         |         |                                                       |
| Add                                                                                                  |                 |        |              |              |            |                     |         |         |                                                       |
| Inputs from technosphere: electricity/heat                                                           |                 |        | Amount       | Unit         | Distrib    | SD2 <               | Min     | Max     | Comment                                               |
| Transport, freight, lorry 16-32 metric ton, EURO5 (RER)  transport, freight, lorry 16-32 metric ton, |                 |        | 1*250 = 250  | kgkm         |            |                     |         |         | TR Kraft paper raw material from forest area : 250 km |



**Table S7.** Inventory associated with the high-amylose bread wheat flour production step.

| Products                                                                                                                     |                  |                               |              |              |            |                   |                                            |         |                                                 |
|------------------------------------------------------------------------------------------------------------------------------|------------------|-------------------------------|--------------|--------------|------------|-------------------|--------------------------------------------|---------|-------------------------------------------------|
| Outputs to technosphere: Products and co-products                                                                            | Amount           | Unit                          | Quantity     | Allocatio    | Waste type | Category          | Comment                                    |         |                                                 |
| FP- 2 High Amylose Wheat Flour, at industrial mill                                                                           | HAWG*YHAWF = 801 | kg                            | Mass         | 84 %         | Biopolymer | Food\Cereal produ | Economic allocation factors (UNAFTA, 2018) |         |                                                 |
| FP-Pelletized Middlings                                                                                                      | HAWG*YWFP = 728  | kg                            | Mass         | 16 %         | Biopolymer | Food\Cereal produ |                                            |         |                                                 |
| FP-ISS                                                                                                                       | HAWG*YISS = 0.75 | kg                            | Mass         | 0 %          | Others     | Food\Cereal produ | Impurities                                 |         |                                                 |
| Add                                                                                                                          |                  |                               |              |              |            |                   |                                            |         |                                                 |
| Outputs to technosphere: Avoided products                                                                                    | Amount           | Unit                          | Distribution | SD2 or 2SD   | Min        | Max               | Comment                                    |         |                                                 |
| Add                                                                                                                          |                  |                               |              |              |            |                   |                                            |         |                                                 |
| Inputs                                                                                                                       |                  |                               |              |              |            |                   |                                            |         |                                                 |
| Inputs from nature                                                                                                           | Sub-compartment  | Amount                        | Unit         | Distribution | SD2 or 2SD | Min               | Max                                        | Comment |                                                 |
| Add                                                                                                                          |                  |                               |              |              |            |                   |                                            |         |                                                 |
| Inputs from technosphere: materials/fuels                                                                                    |                  | Amount                        | Unit         | Distrit      | SD2 or 2SD | Min               | Max                                        | Comment |                                                 |
| FP-1 High Amylose Wheat Grain                                                                                                |                  | HAWG = 1.5E3                  | kg           |              |            |                   |                                            |         | MP                                              |
| Tap water [Europe without Switzerland]   tap water production, underground water without treatment                           |                  | HAWG*YMO = 75                 | kg           |              |            |                   |                                            |         |                                                 |
| FP-1 bis paper bags x flour                                                                                                  |                  | NSF*MSF*(1+SPSAF) = 3.72      | kg           |              |            |                   |                                            |         |                                                 |
| Chlorine, liquid (RER)   chlorine production, liquid   Cut-off, S                                                            |                  | DETER = 0.00255               | kg           |              |            |                   |                                            |         |                                                 |
| Lubricating oil (RER)   market for lubricating oil   Cut-off, S                                                              |                  | OLUBR = 0.00315               | kg           |              |            |                   |                                            |         |                                                 |
| Inputs from technosphere: electricity/heat                                                                                   |                  | Amount                        | Unit         | Dis          | SD2 or 2SD | Min               | Max                                        | Comment |                                                 |
| Electricity, medium voltage (IT)   electricity voltage transformation from high to medium voltage   Cut-off, S               |                  | 147*HAWG/1000 = 221           | kWh          |              |            |                   |                                            |         | 147 kWh/Mg                                      |
| Transport, freight, lorry 7.5-16 metric ton, EURO5 (RER)   transport, freight, lorry 7.5-16 metric ton, EURO5   Cut-off, S   |                  | HAWG*20 = 3E4                 | kgkm         |              |            |                   |                                            |         | TR HAWF grains Anguillara Sabazia-Bracciano: 20 |
| Transport, freight, lorry 16-32 metric ton, EURO5 (RER)   transport, freight, lorry 16-32 metric ton, EURO5   Cut-off, S     |                  | NSF*MSF*(1+SSAF)*527 = 2.01E3 | kgkm         |              |            |                   |                                            |         | TR paper bags Rho (MI)-Spoleto (PG): 527 km     |
| Transport, freight, lorry 3.5-7.5 metric ton, EURO5 (RER)   transport, freight, lorry 3.5-7.5 metric ton, EURO5   Cut-off, S |                  | (HAWG*YISS+SSAF)*50 = 39.3    | kgkm         |              |            |                   |                                            |         | TR ISS+paper bag waste: 50 km                   |
| Transport, freight, lorry 3.5-7.5 metric ton, EURO5 (RER)   transport, freight, lorry 3.5-7.5 metric ton, EURO5   Cut-off, S |                  | DETER/1000*112 = 0.000286     | kgkm         |              |            |                   |                                            |         | TR Detergent- Nera Montoro (TR) -Bracciano: 112 |
| Transport, freight, lorry 3.5-7.5 metric ton, EURO5 (RER)   transport, freight, lorry 3.5-7.5 metric ton, EURO5   Cut-off, S |                  | OLUBR/1000*133 = 0.000419     | kgkm         |              |            |                   |                                            |         | TR Lubricating oil -Terni-Bracciano: 133 km     |
| Transport, freight, lorry 7.5-16 metric ton, EURO5 (RER)   transport, freight, lorry 7.5-16 metric ton, EURO5   Cut-off, S   |                  | HAWG*YWFP/1000*50 = 36.4      | tkm          |              |            |                   |                                            |         | TR Milling by-products: MFG-CF: 50 km           |
| Emissions to air                                                                                                             | Sub-compartment  | Amount                        | Unit         | Distrib      | SD2 or 2SD | Min               | Max                                        | Comment |                                                 |
| Water                                                                                                                        | low. pop.        | 44.6                          | kg           | Under        |            |                   |                                            |         | see Table 3                                     |
| Add                                                                                                                          |                  |                               |              |              |            |                   |                                            |         |                                                 |
| Emissions to water                                                                                                           | Sub-compartment  | Amount                        | Unit         | Distributio  | SD2 or 2SD | Min               | Max                                        | Comment |                                                 |
| Add                                                                                                                          |                  |                               |              |              |            |                   |                                            |         |                                                 |
| Emissions to soil                                                                                                            | Sub-compartment  | Amount                        | Unit         | Distribution | SD2 or 2SD | Min               | Max                                        | Comment |                                                 |
| Add                                                                                                                          |                  |                               |              |              |            |                   |                                            |         |                                                 |
| Final waste flows                                                                                                            | Sub-compartment  | Amount                        | Unit         | Distribution | SD2 or 2SD | Min               | Max                                        | Comment |                                                 |
| Add                                                                                                                          |                  |                               |              |              |            |                   |                                            |         |                                                 |
| Non material emissions                                                                                                       | Sub-compartment  | Amount                        | Unit         | Distribution | SD2 or 2SD | Min               | Max                                        | Comment |                                                 |
| Add                                                                                                                          |                  |                               |              |              |            |                   |                                            |         |                                                 |
| Social issues                                                                                                                | Sub-compartment  | Amount                        | Unit         | Distribution | SD2 or 2SD | Min               | Max                                        | Comment |                                                 |
| Add                                                                                                                          |                  |                               |              |              |            |                   |                                            |         |                                                 |
| Economic issues                                                                                                              | Sub-compartment  | Amount                        | Unit         | Distribution | SD2 or 2SD | Min               | Max                                        | Comment |                                                 |
| Add                                                                                                                          |                  |                               |              |              |            |                   |                                            |         |                                                 |
| Outputs to technosphere: Waste and emissions to treatment                                                                    |                  | Amount                        | Unit         | Distribut    | SD2 or 2SD | Min               | Max                                        | Comment |                                                 |
| Inert waste, for final disposal (RoW)   treatment of inert waste, inert material landfill   Cut-off, S                       |                  | HAWG*YISS = 0.75              | kg           |              |            |                   |                                            |         |                                                 |
| Paper (waste treatment) (GLO)   recycling of paper   Cut-off, S                                                              |                  | SSAF*.808 = 0.0298            | kg           |              |            |                   |                                            |         |                                                 |
| Waste paperboard (RoW)   treatment of, sanitary landfill   Cut-off, S                                                        |                  | SSAF*.116 = 0.00428           | kg           |              |            |                   |                                            |         |                                                 |
| Waste paperboard (Europe without Switzerland)   treatment of waste paperboard, municipal incineration   Cut-off, S           |                  | SSAF*.076 = 0.0028            | kg           |              |            |                   |                                            |         |                                                 |

**Table S8.** Total and partial material balances of the fresh pasta making, pasteurization, and pre-drying processes process using the HABW flour obtained by milling the HABW grains harvested from a nominal fertilized soil area of 1 ha (cf. Table S4). All symbols were listed in the Nomenclature section.

| Step       | Kneading |       |       |       |     |       |        |       | Extrusion |     |        |       | Pasteurization |       |        |       | Pre-drying/Cooling |        |       |       |
|------------|----------|-------|-------|-------|-----|-------|--------|-------|-----------|-----|--------|-------|----------------|-------|--------|-------|--------------------|--------|-------|-------|
| Stream     | HABWF    |       | WI    |       | SI  |       | I      |       | VT        |     | PTU    |       | VP             |       | PPU    |       | VAT                |        | PP    |       |
|            | kg       | %     | kg    | %     | kg  | %     | kg     | %     | kg        | %   | kg     | %     | kg             | %     | kg     | %     | kg                 | %      | kg    | %     |
| Water      | 103.2    | 12.88 | 296.5 | 100.0 | 1.6 | 36.41 | 398.2  | 36.4  | 85.7      | 100 | 312.4  | 31.0  | 50.4           | 100.0 | 362.8  | 34.29 | 143.2              | 100.00 | 219.6 | 24.0  |
| Dry matter | 698.2    | 87.12 | 0.0   | 0.0   | 2.8 | 63.59 | 695.4  | 63.6  | 0.0       | 0   | 695.4  | 69.0  | 0.0            | 0.0   | 695.4  | 65.71 | 0.0                | 0.00   | 695.4 | 76.0  |
| Total      | 801.4    | 100.0 | 296.5 | 100.0 | 4.4 | 100.0 | 1093.6 | 100.0 | 85.7      | 100 | 1007.9 | 100.0 | 50.4           | 100.0 | 1058.2 | 100.0 | 143.2              | 100.00 | 915.0 | 100.0 |

**Table S9.** Inventory associated with the high-amylose bread wheat fresh pasta production step.

| Products                                                                                                        |  |                      |                       |              |              |            |                   |                                                                |                                                                                  |
|-----------------------------------------------------------------------------------------------------------------|--|----------------------|-----------------------|--------------|--------------|------------|-------------------|----------------------------------------------------------------|----------------------------------------------------------------------------------|
| Outputs to technosphere: Products and co-products                                                               |  | Amount               | Unit                  | Quantity     | Allocatio    | Waste type | Category          | Comment                                                        |                                                                                  |
| FP- 3 Fresh Pasta from HAWF, at packaging                                                                       |  | PFPACK = 901         | kg                    | Mass         | 100 %        | Compost    | Food\Cereal produ |                                                                |                                                                                  |
| FP-SI-SPP                                                                                                       |  | ORGW = 18.1          | kg                    | Mass         | 0 %          | Biopolymer | Food\Cereal produ | Dough (SI) & pasteurized fresh pasta (SPP) wastes (Tables 4&6) |                                                                                  |
| Add                                                                                                             |  |                      |                       |              |              |            |                   |                                                                |                                                                                  |
| Outputs to technosphere: Avoided products                                                                       |  | Amount               | Unit                  | Distribution | SD2 or 2SD   | Min        | Max               | Comment                                                        |                                                                                  |
| Add                                                                                                             |  |                      |                       |              |              |            |                   |                                                                |                                                                                  |
| Inputs                                                                                                          |  |                      |                       |              |              |            |                   |                                                                |                                                                                  |
| Inputs from nature                                                                                              |  | Sub-compartment      | Amount                | Unit         | Distribution | SD2 or 2SD | Min               | Max                                                            | Comment                                                                          |
| Add                                                                                                             |  |                      |                       |              |              |            |                   |                                                                |                                                                                  |
| Inputs from technosphere: materials/fuels                                                                       |  |                      | Amount                | Unit         | Distrib      | SD2 or 2SD | Min               | Max                                                            | Comment                                                                          |
| FP- 2 High Amylose Wheat Flour, at industrial mill                                                              |  |                      | HAWF = 801            | kg           |              |            |                   |                                                                |                                                                                  |
| Tap water (Europe without Switzerland)  market for   Cut-off, S                                                 |  |                      | HAWF*WFR = 297        | kg           |              |            |                   |                                                                | Water for dough preparation                                                      |
| Water, deionised (Europe without Switzerland)  water production, deionised   Cut-off, S                         |  |                      | 50.4                  | kg           | Unde         |            |                   |                                                                | To obtain steam x fresh pasta pasteurization                                     |
| Chlorine, liquid (GLO)  production   Cut-off, S                                                                 |  |                      | DETER = 0.0141        | kg           |              |            |                   |                                                                |                                                                                  |
| Lubricating oil (RER)  market for lubricating oil   Cut-off, S                                                  |  |                      | OLUBR = 0.0266        | kg           |              |            |                   |                                                                |                                                                                  |
| Add                                                                                                             |  |                      |                       |              |              |            |                   |                                                                |                                                                                  |
| Inputs from technosphere: electricity/heat                                                                      |  |                      | Amount                | Unit         | Distrib      | SD2 or 2SD | Min               | Max                                                            | Comment                                                                          |
| Heat, central or small-scale, natural gas (Europe without Switzerland)  heat production, natu                   |  |                      | PFPACK/1000*20 = 18   | kWh          |              |            |                   |                                                                | Thermal energy 20 kWh/Mg fresh pasta                                             |
| Electricity, medium voltage (IT)  electricity voltage transformation from high to medium vol                    |  |                      | PFPACK/1000*200 = 180 | kWh          |              |            |                   |                                                                | Electric energy 200 kWh/Mg fresh pasta                                           |
| Transport, freight, lorry 7.5-16 metric ton, EURO5 (RER)  transport, freight, lorry 7.5-16 metri                |  |                      | HAWF*60 = 4.81E4      | kgkm         |              |            |                   |                                                                | TR HAWF - Bracciano (RM)- Roma: 60 km                                            |
| Transport, freight, lorry 3.5-7.5 metric ton, EURO5 (RER)  transport, freight, lorry 3.5-7.5 metri              |  |                      | DETER*83 = 1.17       | kgkm         |              |            |                   |                                                                | TR Detergent - Nera Montoro (TR)-RM: 83 km                                       |
| Transport, freight, lorry 3.5-7.5 metric ton, EURO5 (RER)  transport, freight, lorry 3.5-7.5 metri              |  |                      | OLUBR*103 = 2.74      | kgkm         |              |            |                   |                                                                | TR Lubricating oil -Terni -RM: 103 km                                            |
| Emissions to air                                                                                                |  | Sub-compartment      | Amount                | Unit         | Distrib      | SD2 or 2SD | Min               | Max                                                            | Comment                                                                          |
| Water                                                                                                           |  | low. pop., long-term | 85.7                  | kg           | Unde         |            |                   |                                                                | Water evaporated at the extruder                                                 |
| Water                                                                                                           |  | low. pop., long-term | 143.2                 | kg           | Unde         |            |                   |                                                                | Water evaporated to reduce the moisture of fresh pasta to 24% w/w (see Table 4). |
| Ethane, 1,1,1,2-tetrafluoro-, HFC-134a                                                                          |  | low. pop., long-term | PFPACK*FGY*.04 = 23.4 | mg           |              |            |                   |                                                                | Fugitive gas leakage (R404)                                                      |
| Ethane, 1,1,1-trifluoro-, HFC-143a                                                                              |  | low. pop., long-term | PFPACK*FGY*.52 = 305  | mg           |              |            |                   |                                                                |                                                                                  |
| Ethane, pentafluoro-, HFC-125                                                                                   |  | low. pop., long-term | PFPACK*FGY*.44 = 258  | mg           |              |            |                   |                                                                |                                                                                  |
| Outputs to technosphere: Waste and emissions to treatment                                                       |  |                      | Amount                | Unit         | Distrib      | SD2 or 2SD | Min               | Max                                                            | Comment                                                                          |
| Wastewater, from residence (RoW)  treatment of, capacity 1.1E10l/year   Cut-off, S                              |  |                      | PFPACK/1000*72 = 64.9 | l            |              |            |                   |                                                                | 72 L/Mg of fresh pasta                                                           |
| Biowaste (RoW)  treatment of biowaste by anaerobic digestion   Cut-off, S                                       |  |                      | ORGW*.255 = 4.62      | kg           |              |            |                   |                                                                | Organic Waste disposal (Table 8)                                                 |
| Sludge from pulp and paper production (Europe without Switzerland)  treatment of sludge from pulp and paper pro |  |                      | ORGW*.31 = 5.62       | kg           |              |            |                   |                                                                | "                                                                                |
| Raw sewage sludge (RoW)  treatment of, municipal incineration   Cut-off, S                                      |  |                      | ORGW*.18 = 3.26       | kg           |              |            |                   |                                                                | "S                                                                               |
| Biowaste (RoW)  treatment of biowaste, industrial composting   Cut-off, S                                       |  |                      | ORGW*.255 = 4.62      | kg           |              |            |                   |                                                                | "                                                                                |

**Table S10.** Percentage fraction of the processing and packaging materials discarded, as collected in the fresh pasta factory examined in this work.

| Processing and Packaging Materials discarded | Discarded Fraction (%) |
|----------------------------------------------|------------------------|
| Paper bags for wheat flour                   | 1.0                    |
| Dough waste                                  | 0.4                    |
| Fresh pasta waste                            | 1.5                    |
| <i>Primary packaging</i>                     |                        |
| PE bags                                      | 3.0                    |
| PE bag label                                 | 0.5                    |
| <i>Secondary packaging</i>                   |                        |
| Cartons (CAW)                                | 1.0                    |
| Carton label                                 | 0.3                    |
| Scotch tape                                  | 0.3                    |
| <i>Tertiary packaging</i>                    |                        |
| Damaged wooden pallet                        | 0.2                    |
| Wooden pallet label waste                    | 0.2                    |
| Wooden pallet stretch & shrink film waste    | 0.2                    |

**Table S11.** Total material balance of the packaging process of the HABW fresh pasta. All symbols were listed in the Nomenclature section.

| Step         | Primary packaging   |      |                  |                   |       |         |       |        |        |       |
|--------------|---------------------|------|------------------|-------------------|-------|---------|-------|--------|--------|-------|
| Stream       | PP                  | SPP  | N <sub>2</sub> L | CO <sub>2</sub> L |       | PE      | SPE   | ES     | SES    | PFS   |
|              | (kg)                | (kg) | (kg)             | (kg)              | no.   | (kg)    | (kg)  | (kg)   | (kg)   | (kg)  |
| <b>Total</b> | 915.0               | 13.7 | 9.0              | 4.5               | 1803  | 29.2    | 0.9   | 1.8    | 0.01   | 945.0 |
| Step         | Secondary packaging |      |                  |                   |       |         |       |        |        |       |
| Stream       | CA                  | SCA  | EC               | SEC               |       | SC      | SCW   | PFC    |        |       |
|              | no.                 | (kg) | (kg)             | (kg)              | (kg)  | (kg)    | (kg)  | (kg)   |        |       |
| <b>Total</b> | 150                 | 85.0 | 0.8              | 0.3               | 0.001 | 1.1     | 0.003 | 1030.4 |        |       |
| Step         | Tertiary packaging  |      |                  |                   |       |         |       |        |        |       |
| Stream       | PAL                 | SPAL |                  | EP                |       | SEP     | FP    | SFP    | PFP    |       |
|              | n°                  | (kg) | (kg)             | n°                | (kg)  | (kg)    | (kg)  | (kg)   | (kg)   |       |
| <b>Total</b> | 3.8                 | 82.8 | 0.2              | 7.5               | 0.023 | 0.00005 | 2.574 | 0.005  | 1115.6 |       |

**Table S12.** Inventory associated with the PE bag production step.

| Products                                                                                          |                   |        |              |              |            |                   |                                                                               |         |                                          |
|---------------------------------------------------------------------------------------------------|-------------------|--------|--------------|--------------|------------|-------------------|-------------------------------------------------------------------------------|---------|------------------------------------------|
| Outputs to technosphere: Products and co-products                                                 | Amount            | Unit   | Quantity     | Allocatio    | Waste type | Category          | Comment                                                                       |         |                                          |
| FP-4 PE bag                                                                                       | 1                 | kg     | Mass         | 100 %        | PE         | Food\Cereal produ | This process allowed the manufacture of the primary packages for fresh pasta. |         |                                          |
| Add                                                                                               |                   |        |              |              |            |                   |                                                                               |         |                                          |
| Outputs to technosphere: Avoided products                                                         | Amount            | Unit   | Distribution | SD2 or 2SD   | Min        | Max               | Comment                                                                       |         |                                          |
| Add                                                                                               |                   |        |              |              |            |                   |                                                                               |         |                                          |
| Inputs                                                                                            |                   |        |              |              |            |                   |                                                                               |         |                                          |
| Inputs from nature                                                                                | Sub-compartment   | Amount | Unit         | Distribution | SD2 or 2SD | Min               | Max                                                                           | Comment |                                          |
| Add                                                                                               |                   |        |              |              |            |                   |                                                                               |         |                                          |
| Inputs from technosphere: materials/fuels                                                         | Amount            |        |              | Unit         | Distrit    | SD2               | Min                                                                           | Max     | Comment                                  |
| Polyethylene, low density, granulate (RER)  production   Cut-off, S                               | 1/0.976 = 1.02    |        |              | kg           |            |                   |                                                                               |         |                                          |
| Add                                                                                               |                   |        |              |              |            |                   |                                                                               |         |                                          |
| Inputs from technosphere: electricity/heat                                                        | Amount            |        |              | Unit         | Distrib    | SD2               | Min                                                                           | Max     | Comment                                  |
| Extrusion, plastic film (RER)  extrusion, plastic film   Cut-off, S                               | 1/0.976 = 1.02    |        |              | kg           |            |                   |                                                                               |         |                                          |
| Transport, freight, lorry 7.5-16 metric ton, EURO5 (RER)  transport, freight, lorry 7.5-16 metric | 1/0.976*150 = 154 |        |              | kgkm         |            |                   |                                                                               |         | TR PE granules PS -Avezzano (AQ): 150 km |
| Add                                                                                               |                   |        |              |              |            |                   |                                                                               |         |                                          |
| Outputs to technosphere: Waste and emissions to treatment                                         | Amount            |        |              | Unit         | Distrib    | SD2 or            | Min                                                                           | Max     | Comment                                  |
| Waste polyethylene (GLO)  treatment of waste polyethylene, open burning   Cut-off, S              | 1/976-1 = 0.0246  |        |              | kg           |            |                   |                                                                               |         |                                          |

**Table S13.** Inventory associated with the paper label production step.

| Products                                                                                          |  |                 |        |              |              |            |                    |                                        |         |                                   |
|---------------------------------------------------------------------------------------------------|--|-----------------|--------|--------------|--------------|------------|--------------------|----------------------------------------|---------|-----------------------------------|
| Outputs to technosphere: Products and co-products                                                 |  | Amount          | Unit   | Quantity     | Allocatio    | Waste type | Category           | Comment                                |         |                                   |
| FP-5 paper label                                                                                  |  | 1               | kg     | Mass         | 100 %        | Paper      | Paper+ B...\Market | Paper labels for I, II, & III packages |         |                                   |
| Add                                                                                               |  |                 |        |              |              |            |                    |                                        |         |                                   |
| Outputs to technosphere: Avoided products                                                         |  | Amount          | Unit   | Distribution | SD2 or 2SD   | Min        | Max                | Comment                                |         |                                   |
| Add                                                                                               |  |                 |        |              |              |            |                    |                                        |         |                                   |
| Inputs                                                                                            |  |                 |        |              |              |            |                    |                                        |         |                                   |
| Inputs from nature                                                                                |  | Sub-compartment | Amount | Unit         | Distribution | SD2 or 2SD | Min                | Max                                    | Comment |                                   |
| Add                                                                                               |  |                 |        |              |              |            |                    |                                        |         |                                   |
| Inputs from technosphere: materials/fuels                                                         |  |                 |        | Amount       | Unit         | Distrit    | SD2                | Min                                    | Max     | Comment                           |
| Graphic paper, 100% recycled (RER)  production   Cut-off, S                                       |  |                 |        | 1            | kg           | Unde       |                    |                                        |         |                                   |
| Add                                                                                               |  |                 |        |              |              |            |                    |                                        |         |                                   |
| Inputs from technosphere: electricity/heat                                                        |  |                 |        | Amount       | Unit         | Distrib    | SD2                | Min                                    | Max     | Comment                           |
| Printed paper (Europe without Switzerland)  operation, printer, laser, colour, per kg   Cut-off   |  |                 |        | 1            | kg           | Undefi     |                    |                                        |         |                                   |
| Transport, freight, lorry 7.5-16 metric ton, EURO5 (RER)  transport, freight, lorry 7.5-16 metric |  |                 |        | 1*250 = 250  | kgkm         |            |                    |                                        |         | TR Paper for labels PS-FG: 250 km |

**Table S14.** Inventory associated with the carton production step.

| Products                                                                                          |  |                 |             |              |              |            |                     |                       |                                          |         |
|---------------------------------------------------------------------------------------------------|--|-----------------|-------------|--------------|--------------|------------|---------------------|-----------------------|------------------------------------------|---------|
| Outputs to technosphere: Products and co-products                                                 |  | Amount          | Unit        | Quantity     | Allocatio    | Waste type | Category            | Comment               |                                          |         |
| FP-6 carton                                                                                       |  | 1               | kg          | Mass         | 100 %        | Cardboard  | P...\Transformation | Production of cartons |                                          |         |
| Add                                                                                               |  |                 |             |              |              |            |                     |                       |                                          |         |
| Outputs to technosphere: Avoided products                                                         |  | Amount          | Unit        | Distribution | SD2 or 2SD   | Min        | Max                 | Comment               |                                          |         |
| Add                                                                                               |  |                 |             |              |              |            |                     |                       |                                          |         |
| Inputs                                                                                            |  |                 |             |              |              |            |                     |                       |                                          |         |
| Inputs from nature                                                                                |  | Sub-compartment | Amount      | Unit         | Distribution | SD2 or 2SD | Min                 | Max                   | Comment                                  |         |
| Add                                                                                               |  |                 |             |              |              |            |                     |                       |                                          |         |
| Inputs from technosphere: materials/fuels                                                         |  |                 |             | Amount       | Unit         | Distrit    | SD2 <               | Min                   | Max                                      | Comment |
| Corrugated board box (RER)  production   Cut-off, S                                               |  |                 |             | 1            | kg           | Unde       |                     |                       |                                          |         |
| Add                                                                                               |  |                 |             |              |              |            |                     |                       |                                          |         |
| Inputs from technosphere: electricity/heat                                                        |  |                 | Amount      | Unit         | Distrib      | SD2        | Min                 | Max                   | Comment                                  |         |
| Folding boxboard carton (RER)  market for folding boxboard carton   Cut-off, S                    |  |                 | 1           | kg           | Undefi       |            |                     |                       |                                          |         |
| Transport, freight, lorry 7.5-16 metric ton, EURO5 (RER)  transport, freight, lorry 7.5-16 metric |  |                 | 1*250 = 250 | kgkm         |              |            |                     |                       | TS: Raw Material x Cartons PF-FG: 250 km |         |

**Table S15.** Inventory associated with the scotch tape production step.

| Products                                                                                          |  |                 |        |                   |                    |            |                      |                       |         |                                                  |         |
|---------------------------------------------------------------------------------------------------|--|-----------------|--------|-------------------|--------------------|------------|----------------------|-----------------------|---------|--------------------------------------------------|---------|
| Outputs to technosphere: Products and co-products                                                 |  | Amount          | Unit   | Quantity          | Allocatio          | Waste type | Category             | Comment               |         |                                                  |         |
| FP-7 scotch tape                                                                                  |  | 1               | kg     | Mass              | 100 %              | PP         | Pl...\Transformation | Scotch tape x cartons |         |                                                  |         |
| Add                                                                                               |  |                 |        |                   |                    |            |                      |                       |         |                                                  |         |
| Outputs to technosphere: Avoided products                                                         |  | Amount          | Unit   | Distribution      | SD2 or 2SD         | Min        | Max                  | Comment               |         |                                                  |         |
| Add                                                                                               |  |                 |        |                   |                    |            |                      |                       |         |                                                  |         |
| Inputs                                                                                            |  |                 |        |                   |                    |            |                      |                       |         |                                                  |         |
| Inputs from nature                                                                                |  | Sub-compartment | Amount | Unit              | Distribution       | SD2 or 2SD | Min                  | Max                   | Comment |                                                  |         |
| Add                                                                                               |  |                 |        |                   |                    |            |                      |                       |         |                                                  |         |
| Inputs from technosphere: materials/fuels                                                         |  |                 |        | Amount            | Unit               | Distrib    | SD2 or 2SD           | Min                   | Max     | Comment                                          |         |
| Polypropylene, granulate (RER)  production   Cut-off, S                                           |  |                 |        | 1/976 = 1.02      | kg                 |            |                      |                       |         |                                                  |         |
| Add                                                                                               |  |                 |        |                   |                    |            |                      |                       |         |                                                  |         |
| Inputs from technosphere: electricity/heat                                                        |  |                 |        | Amount            | Unit               | Distrib    | SD2 or 2SD           | Min                   | Max     | Comment                                          |         |
| Extrusion, plastic film (RER)  extrusion, plastic film   Cut-off, S                               |  |                 |        | 1/976 = 1.02      | kg                 |            |                      |                       |         |                                                  |         |
| Transport, freight, lorry 7.5-16 metric ton, EURO5 (RER)  transport, freight, lorry 7.5-16 metric |  |                 |        | 1/0.976*150 = 154 | kgkm               |            |                      |                       |         | TS: PE granules PS-FG: 150 km                    |         |
| Acrylic binder, without water, in 34% solution state (RER)  acrylic binder production, product    |  |                 |        | 1/30 = 0.0333     | kg                 |            |                      |                       |         | tape thickness 300 micron, acrylic one 10 micron |         |
| Outputs to technosphere: Waste and emissions to treatment                                         |  |                 |        |                   |                    |            |                      |                       |         |                                                  |         |
| Outputs to technosphere: Waste and emissions to treatment                                         |  |                 |        |                   | Amount             | Unit       | Distrib              | SD2 or 2SD            | Min     | Max                                              | Comment |
| Waste polypropylene (GLO)  treatment of waste polypropylene, open burning   Cut-off, S            |  |                 |        |                   | 1/0.976-1 = 0.0246 | kg         |                      |                       |         |                                                  |         |



**Table S16.** Inventory associated with the EPAL wooden pallet production step.

| Products                                                                                        |  |                 |                |              |              |            |                      |         |         |                                                         |         |
|-------------------------------------------------------------------------------------------------|--|-----------------|----------------|--------------|--------------|------------|----------------------|---------|---------|---------------------------------------------------------|---------|
| Outputs to technosphere: Products and co-products                                               |  | Amount          | Unit           | Quantity     | Allocatio    | Waste type | Category             | Comment |         |                                                         |         |
| FP-8 EPAL Pallet                                                                                |  | 22              | kg             | Mass         | 100 %        | Wood       | Pl...\Transformation |         |         |                                                         |         |
| Add                                                                                             |  |                 |                |              |              |            |                      |         |         |                                                         |         |
| Outputs to technosphere: Avoided products                                                       |  | Amount          | Unit           | Distribution | SD2 or 2SD   | Min        | Max                  | Comment |         |                                                         |         |
| Add                                                                                             |  |                 |                |              |              |            |                      |         |         |                                                         |         |
| Inputs                                                                                          |  |                 |                |              |              |            |                      |         |         |                                                         |         |
| Inputs from nature                                                                              |  | Sub-compartment | Amount         | Unit         | Distribution | SD2 or 2SD | Min                  | Max     | Comment |                                                         |         |
| Add                                                                                             |  |                 |                |              |              |            |                      |         |         |                                                         |         |
| Inputs from technosphere: materials/fuels                                                       |  |                 |                | Amount       |              | Unit       | Distrib              | SD2 <   | Min     | Max                                                     | Comment |
| EUR-flat pallet (RER)  market for EUR-flat pallet   Cut-off, S                                  |  |                 |                | 1            |              | p          | Unde                 |         |         |                                                         |         |
| Add                                                                                             |  |                 |                |              |              |            |                      |         |         |                                                         |         |
| Inputs from technosphere: electricity/heat                                                      |  |                 | Amount         |              | Unit         | Dis        | SE                   | Mi      | Ma      | Comment                                                 |         |
| Transport, freight, lorry 16-32 metric ton, EURO5 (RER)  transport, freight, lorry 16-32 metric |  |                 | 22*100 = 2.2E3 |              | kgkm         |            |                      |         |         | TR Wood x Pallet PS-wood pallet managing center: 100 km |         |



**Table S17.** Inventory associated with the shrink & shrank PE film production step.

| Products                                                                                                            |                 |        |                   |                  |            |                      |            |         |                              |         |
|---------------------------------------------------------------------------------------------------------------------|-----------------|--------|-------------------|------------------|------------|----------------------|------------|---------|------------------------------|---------|
| Outputs to technosphere: Products and co-products                                                                   | Amount          | Unit   | Quantity          | Allocatio        | Waste type | Category             | Comment    |         |                              |         |
| FP- 9 PE film x pallet                                                                                              | 1               | kg     | Mass              | 100 %            | PE         | Pl...\Transformation |            |         |                              |         |
| Add                                                                                                                 |                 |        |                   |                  |            |                      |            |         |                              |         |
| Outputs to technosphere: Avoided products                                                                           | Amount          | Unit   | Distribution      | SD2 or 2SD       | Min        | Max                  | Comment    |         |                              |         |
| Add                                                                                                                 |                 |        |                   |                  |            |                      |            |         |                              |         |
| Inputs                                                                                                              |                 |        |                   |                  |            |                      |            |         |                              |         |
| Inputs from nature                                                                                                  | Sub-compartment | Amount | Unit              | Distribution     | SD2 or 2SD | Min                  | Max        | Comment |                              |         |
| Add                                                                                                                 |                 |        |                   |                  |            |                      |            |         |                              |         |
| Inputs from technosphere: materials/fuels                                                                           |                 |        | Amount            | Unit             | Distrib    | SD2 or 2SD           | Min        | Max     | Comment                      |         |
| Polyethylene, low density, granulate (RER)   production   Cut-off, S                                                |                 |        | 1/976 = 1.02      | kg               |            |                      |            |         |                              |         |
| Add                                                                                                                 |                 |        |                   |                  |            |                      |            |         |                              |         |
| Inputs from technosphere: electricity/heat                                                                          |                 |        | Amount            | Unit             | Distrib    | SD2 or 2SD           | Min        | Max     | Comment                      |         |
| Extrusion, plastic film (RER)   extrusion, plastic film   Cut-off, S                                                |                 |        | 1/0.976 = 1.02    | kg               |            |                      |            |         |                              |         |
| Transport, freight, lorry 7.5-16 metric ton, EURO5 (RoW)   transport, freight, lorry 7.5-16 metric ton, EURO5 (RoW) |                 |        | 1/0.976*150 = 154 | kgkm             |            |                      |            |         | TR PE granules PS-FG: 150 km |         |
|                                                                                                                     |                 |        |                   |                  |            |                      |            |         |                              |         |
| Outputs to technosphere: Waste and emissions to treatment                                                           |                 |        |                   | Amount           | Unit       | Distrib              | SD2 or 2SD | Min     | Max                          | Comment |
| Waste polyethylene (GLO)   treatment of waste polyethylene, open burning   Cut-off, S                               |                 |        |                   | 1/976-1 = 0.0246 | kg         |                      |            |         |                              |         |
| Add                                                                                                                 |                 |        |                   |                  |            |                      |            |         |                              |         |

**Table S18.** Assembly of the primary packaging for fresh pasta.

| Name                                                                                                   | Status               | Comment                        |              |            |      |     |                                          |
|--------------------------------------------------------------------------------------------------------|----------------------|--------------------------------|--------------|------------|------|-----|------------------------------------------|
| FP- 13 Assembly of Primary Packaging                                                                   | Finished             | Assemblaggio del Pack I in MAP |              |            |      |     |                                          |
| Materials/Assemblies                                                                                   | Amount               | Unit                           | Distribution | SD2 or 2SD | Min  | Max | Comment                                  |
| FP-4 PE bag                                                                                            | 15.7                 | g                              | Triangle     |            | 15.4 | 16  |                                          |
| FP-5 paper label                                                                                       | 1                    | g                              | Undefined    |            |      |     |                                          |
| Add                                                                                                    |                      |                                |              |            |      |     |                                          |
| Processes                                                                                              | Amount               | Unit                           | Distribution | SD2 or 2SD | Min  | Max | Comment                                  |
| Transport, freight, lorry 7.5-16 metric ton, EURO5 (RER)   transport, freight, lorry 7.5-16 metric ton | 15.7/1000*106 = 1.66 | kgkm                           |              |            |      |     | TR PE bags- Avezzano (AQ) - Roma: 106 km |
| Transport, freight, lorry 7.5-16 metric ton, EURO5 (RER)   transport, freight, lorry 7.5-16 metric ton | 1/1000*65 = 0.065    | kgkm                           |              |            |      |     | TR Labels- Nettuno (RM) - Roma: 65 km    |

**Table S19.** Assembly of the secondary packaging for fresh pasta.

| Name                                                                                                  | Status             | Comment                                        |              |            |         |           |         |     |                                             |
|-------------------------------------------------------------------------------------------------------|--------------------|------------------------------------------------|--------------|------------|---------|-----------|---------|-----|---------------------------------------------|
| FP- 14 Assembly of Secondary Packaging                                                                | Finished           | Assembly of Secondary Packages for fresh pasta |              |            |         |           |         |     |                                             |
| Materials/Assemblies                                                                                  | Amount             | Unit                                           | Distribution | SD2 or 2SD | Min     | Max       | Comment |     |                                             |
| FP-6 carton                                                                                           | 560                | g                                              | Triangle     |            | 555     | 565       |         |     |                                             |
| FP-5 paper label                                                                                      | 2                  | g                                              | Undefined    |            |         |           |         |     |                                             |
| FP-7 scotch tape                                                                                      | 7                  | g                                              | Undefined    |            |         |           |         |     |                                             |
| Add                                                                                                   |                    |                                                |              |            |         |           |         |     |                                             |
| Processes                                                                                             | Amount             |                                                |              | Unit       | Distrib | SD2 or 2S | Min     | Max | Comment                                     |
| Transport, freight, lorry 7.5-16 metric ton, EURO5 (RER)  transport, freight, lorry 7.5-16 metric ton | 560/1000*65 = 36.4 |                                                |              | kgkm       |         |           |         |     | TR Cartons - Nettuno (RM)-Roma: 65 km       |
| Transport, freight, lorry 7.5-16 metric ton, EURO5 (RER)  transport, freight, lorry 7.5-16 metric ton | 7/1000*100 = 0.7   |                                                |              | kgkm       |         |           |         |     | TR Scotch tape: Avezzano (AQ)-Roma: 100 km  |
| Transport, freight, lorry 7.5-16 metric ton, EURO5 (RER)  transport, freight, lorry 7.5-16 metric ton | 2/1000*65 = 0.13   |                                                |              | kgkm       |         |           |         |     | TR Paper labels- Nettuno (RM) - Roma: 65 km |

**Table S20.** Assembly of the tertiary packaging for fresh pasta.

| Name                                                                                                  | Status      | Comment                                       |              |            |              |            |         |     |                                          |
|-------------------------------------------------------------------------------------------------------|-------------|-----------------------------------------------|--------------|------------|--------------|------------|---------|-----|------------------------------------------|
| FP- 15 Assembly of Tertiary Packaging                                                                 | Finished    | Assembly of III Packaging in EPAL wood pallet |              |            |              |            |         |     |                                          |
|                                                                                                       |             |                                               |              |            |              |            |         |     |                                          |
| Materials/Assemblies                                                                                  | Amount      | Unit                                          | Distribution | SD2 or 2SD | Min          | Max        | Comment |     |                                          |
| FP-8 EPAL Pallet                                                                                      | 22          | kg                                            | Triangle     |            | 21           | 23         |         |     |                                          |
| Add                                                                                                   |             |                                               |              |            |              |            |         |     |                                          |
|                                                                                                       |             |                                               |              |            |              |            |         |     |                                          |
| Processes                                                                                             | Amount      |                                               |              | Unit       | Distribution | SD2 or 2SD | Min     | Max | Comment                                  |
| Transport, freight, lorry 7.5-16 metric ton, EURO5 (RER)  transport, freight, lorry 7.5-16 metric ton | 22*30 = 660 |                                               |              | kgkm       |              |            |         |     | TR Pallet: EPMC Pomezia (RM)-Roma: 30 km |

**Table S21.** Assembly of primary and secondary packages for fresh pasta.

| Name                                   | Status   | Comment                                                        |              |            |     |     |         |
|----------------------------------------|----------|----------------------------------------------------------------|--------------|------------|-----|-----|---------|
| FP - 16 Assembly of I & II packages    | Finished | Assembly of I & II packaging (12 PE bags da 500 g in a carton) |              |            |     |     |         |
| Materials/Assemblies                   | Amount   | Unit                                                           | Distribution | SD2 or 2SD | Min | Max | Comment |
| FP- 13 Assembly of Primary Packaging   | 12       | p                                                              | Undefined    |            |     |     |         |
| FP- 14 Assembly of Secondary Packaging | 1        | p                                                              | Undefined    |            |     |     |         |

**Table S22.** Assembly of primary, secondary, and tertiary packages for fresh pasta.

| Name                                                                                                 | Status                 | Comment                                                             |              |            |     |     |                                               |
|------------------------------------------------------------------------------------------------------|------------------------|---------------------------------------------------------------------|--------------|------------|-----|-----|-----------------------------------------------|
| FP - 17 Assembly of I, II & III packages                                                             | Finished               | Assembly of I, II & III Packs (40 carton x pallet + PE film+Labels) |              |            |     |     |                                               |
| Materials/Assemblies                                                                                 | Amount                 | Unit                                                                | Distribution | SD2 or 2SD | Min | Max | Comment                                       |
| FP - 16 Assembly of I & II packages                                                                  | 40                     | p                                                                   | Undefined    |            |     |     |                                               |
| FP- 9 PE film x pallet                                                                               | 684                    | g                                                                   | Undefined    |            |     |     |                                               |
| FP-5 paper label                                                                                     | 2*3.11 = 6.22          | g                                                                   |              |            |     |     |                                               |
| Add                                                                                                  |                        |                                                                     |              |            |     |     |                                               |
| Processes                                                                                            | Amount                 | Unit                                                                | Distribution | SD2 or 2SD | Min | Max | Comment                                       |
| Transport, freight, lorry 7.5-16 metric ton, EURO5 (RoW) transport, freight, lorry 7.5-16 metric ton | 684/1000*100 = 68.4    | kgkm                                                                |              |            |     |     | TR Film x pallet - Avezzano (AQ)-Roma: 100 km |
| Transport, freight, lorry 7.5-16 metric ton, EURO5 (RoW) transport, freight, lorry 7.5-16 metric ton | 2*3.11/1000*65 = 0.404 | kgkm                                                                |              |            |     |     | TR Labels x pallet - Nettuno (RM)-Roma: 65 km |

**Table S23.** Assembly of fresh pasta (1 Functional Unit).

| Name                                                                                                 | Status                  | Comment                                                                 |              |            |     |     |                                                  |
|------------------------------------------------------------------------------------------------------|-------------------------|-------------------------------------------------------------------------|--------------|------------|-----|-----|--------------------------------------------------|
| FP - 18 Assembly of Fresh Pasta                                                                      | Finished                | Assembly of 1 Functional Unit: 500-g fresh pasta in modified atmosphere |              |            |     |     |                                                  |
| Materials/Assemblies                                                                                 | Amount                  | Unit                                                                    | Distribution | SD2 or 2SD | Min | Max | Comment                                          |
| FP- 3 Fresh Pasta from HAWF, at packaging                                                            | 0.5                     | kg                                                                      | Undefined    |            |     |     |                                                  |
| Nitrogen, liquid (RER) market for   Cut-off, S                                                       | 5                       | g                                                                       | Undefined    |            |     |     |                                                  |
| Carbon dioxide, liquid (RER) market for   Cut-off, S                                                 | 2.5                     | g                                                                       | Undefined    |            |     |     |                                                  |
| Add                                                                                                  |                         |                                                                         |              |            |     |     |                                                  |
| Processes                                                                                            | Amount                  | Unit                                                                    | Distribution | SD2 or 2SD | Min | Max | Comment                                          |
| Transport, freight, lorry 7.5-16 metric ton, EURO5 (RER) transport, freight, lorry 7.5-16 metric ton | (5+2.5)/1000*95 = 0.713 | kgkm                                                                    |              |            |     |     | TR Liquid N2 + CO2-Nera Montoro (TR)-Roma: 95 km |

**Table S24.** Inventory associated with the use phase.

| Products                                                                                                               |  |                      |           |                           |              |                    |                                 |         |                                                           |                                                                                                     |
|------------------------------------------------------------------------------------------------------------------------|--|----------------------|-----------|---------------------------|--------------|--------------------|---------------------------------|---------|-----------------------------------------------------------|-----------------------------------------------------------------------------------------------------|
| Outputs to technosphere: Products and co-products                                                                      |  | Amount               | Unit      | Quantity                  | Allocation   | Category           | Comment                         |         |                                                           |                                                                                                     |
| FP- 19 Use Phase                                                                                                       |  | RFP = 1              | kg        | Mass                      | 100 %        | Ot...\Consumer Use | Pasta fresca pastorizzata cruda |         |                                                           |                                                                                                     |
| FP - Cooked Pasta waste                                                                                                |  | Pcotta*PW = 0.034    | kg        | Mass                      | 0 %          | Ot...\Consumer Use |                                 |         |                                                           |                                                                                                     |
| Add                                                                                                                    |  |                      |           |                           |              |                    |                                 |         |                                                           |                                                                                                     |
| Outputs to technosphere: Avoided products                                                                              |  | Amount               | Unit      | Distribution              | SD2 or 2SD   | Min                | Max                             | Comment |                                                           |                                                                                                     |
| Add                                                                                                                    |  |                      |           |                           |              |                    |                                 |         |                                                           |                                                                                                     |
| Inputs                                                                                                                 |  |                      |           |                           |              |                    |                                 |         |                                                           |                                                                                                     |
| Inputs from nature                                                                                                     |  | Sub-compartment      | Amount    | Unit                      | Distribution | SD2 or 2SD         | Min                             | Max     | Comment                                                   |                                                                                                     |
| Add                                                                                                                    |  |                      |           |                           |              |                    |                                 |         |                                                           |                                                                                                     |
| Inputs from technosphere: materials/fuels                                                                              |  |                      |           | Amount                    | Unit         | Distribution       | SD2 or 2SD                      | Min     | Max                                                       | Comment                                                                                             |
| FP- 3 Fresh Pasta from HAWF, at packaging                                                                              |  |                      |           | 0                         | kg           | Under              |                                 |         |                                                           |                                                                                                     |
| Tap water (Europe without Switzerland)  market for   Cut-off, S                                                        |  |                      |           | RFP*WFPR = 10             | kg           |                    |                                 |         |                                                           |                                                                                                     |
| Salt, white, for human consumption (sea, igneous or rock), no enrichment, processed in FR   Ambient (local)            |  |                      |           | Salt*RFP = 100            | g            |                    |                                 |         |                                                           |                                                                                                     |
| Add                                                                                                                    |  |                      |           |                           |              |                    |                                 |         |                                                           |                                                                                                     |
| Inputs from technosphere: electricity/heat                                                                             |  |                      |           | Amount                    | Unit         | Distribution       | SD2 or 2SD                      | Min     | Max                                                       | Comment                                                                                             |
| Electricity, low voltage (IT)  market for   Cut-off, S                                                                 |  |                      |           | EC*0.17 = 0.336           | kWh          |                    |                                 |         |                                                           | It referred to the energy consumed (17 % by electric hob) to cook 1 kg of dry pasta (UNAFPA, 2018). |
| Heat, central or small-scale, natural gas (Europe without Switzerland)  market for heat, central or small-scale        |  |                      |           | EC*0.83 = 1.64            | kWh          |                    |                                 |         |                                                           |                                                                                                     |
| Electricity, low voltage (IT)  market for   Cut-off, S                                                                 |  |                      |           | EFRIAGE = 2.46            | kWh          |                    |                                 |         |                                                           | Electricity consumed for preserving fresh pasta in fridge                                           |
| Outputs                                                                                                                |  |                      |           |                           |              |                    |                                 |         |                                                           |                                                                                                     |
| Emissions to air                                                                                                       |  | Sub-compartment      | Amount    | Unit                      | Distribution | SD2 or 2SD         | Min                             | Max     | Comment                                                   |                                                                                                     |
| Water                                                                                                                  |  | low. pop., long-term | WE = 0.85 | kg                        |              |                    |                                 |         | Acqua evaporata durante la cottura                        |                                                                                                     |
| Nitrogen, atmospheric                                                                                                  |  | low. pop., long-term | 10        | g                         | Under        |                    |                                 |         | N2 freed as 1-kg fresh pasta bags (2 packages) are opened |                                                                                                     |
| Carbon dioxide, fossil                                                                                                 |  | low. pop., long-term | 5         | g                         | Under        |                    |                                 |         |                                                           |                                                                                                     |
| Outputs to technosphere: Waste and emissions to treatment                                                              |  |                      |           | Amount                    | Unit         | Distribution       | SD2 or 2SD                      | Min     | Max                                                       | Comment                                                                                             |
| Biowaste (CH)  treatment of biowaste by anaerobic digestion   Conseq, S                                                |  |                      |           | Pcotta*PW*0.255 = 0.00867 | kg           |                    |                                 |         |                                                           | Pasta waste disposed as organic waste                                                               |
| Biowaste (CH)  treatment of biowaste, industrial composting   Cut-off, S                                               |  |                      |           | Pcotta*PW*0.255 = 0.00867 | kg           |                    |                                 |         |                                                           | see Table 8                                                                                         |
| Sludge from pulp and paper production (Europe without Switzerland)  treatment of sludge from pulp and paper production |  |                      |           | Pcotta*PW*.31 = 0.0105    | kg           |                    |                                 |         |                                                           | Idem                                                                                                |
| Raw sewage sludge (RoW)  treatment of, municipal incineration   Cut-off, S                                             |  |                      |           | Pcotta*PW*.18 = 0.00612   | kg           |                    |                                 |         |                                                           | Idem                                                                                                |
| Wastewater, from residence (RoW)  treatment of, capacity 1.1E10l/year   Cut-off, S                                     |  |                      |           | PWATER = 8.5              | l            |                    |                                 |         |                                                           | Pasta water disposal in the kitchen sink                                                            |

**Table S25.** Waste scenario for plastic packaging wastes (PLW).

| Products                                                                                       |        |      |          |                       |            |                |  |         |     |         |
|------------------------------------------------------------------------------------------------|--------|------|----------|-----------------------|------------|----------------|--|---------|-----|---------|
| Waste specification                                                                            | Amount | Unit | Category | Comment               |            |                |  |         |     |         |
| FP - 10 Plastic Waste Scenarios                                                                | 1      | kg   | Others   |                       |            |                |  |         |     |         |
| Inputs                                                                                         |        |      |          |                       |            |                |  |         |     |         |
| Inputs from technosphere: materials/fuels                                                      |        |      |          | Amount                | Unit       | District SD2 c |  | Min     | Max | Comment |
| Add                                                                                            |        |      |          |                       |            |                |  |         |     |         |
| Inputs from technosphere: electricity/heat                                                     |        |      |          | Amount                | Unit       | Dis SI         |  | M       | M   | Comment |
| Add                                                                                            |        |      |          |                       |            |                |  |         |     |         |
| Outputs                                                                                        |        |      |          |                       |            |                |  |         |     |         |
| Materials and/or waste types separated from waste stream                                       |        |      |          | Material / Waste type |            | Percentage     |  | Comment |     |         |
| Add                                                                                            |        |      |          |                       |            |                |  |         |     |         |
| Waste streams remaining after separation                                                       |        |      |          |                       | Percentage | Comment        |  |         |     |         |
| Waste polyethylene (RoW)  treatment of waste polyethylene, municipal incineration   Cut-off, S |        |      |          |                       | 47 %       | see Table 8    |  |         |     |         |
| PE (waste treatment) (GLO)  recycling of PE   Cut-off, S                                       |        |      |          |                       | 45.6 %     | Idem           |  |         |     |         |
| Waste polyethylene (RoW)  treatment of waste polyethylene, sanitary landfill   Cut-off, S      |        |      |          |                       | 7.4 %      | Idem           |  |         |     |         |

**Table S26.** Waste scenario for cardboard and paper packaging wastes (PCW).

|                                                                           |                       |            |                   |         |         |
|---------------------------------------------------------------------------|-----------------------|------------|-------------------|---------|---------|
| Waste specification                                                       | Amount                | Unit       | Category          | Comment |         |
| FP - 11 Paper&Cardboard Waste Scenarios                                   | 1                     | kg         | Others            |         |         |
| Inputs                                                                    |                       |            |                   |         |         |
| Inputs from technosphere: materials/fuels                                 | Amount                | Unit       | Distrit SD2 c Min | Max     | Comment |
| Add                                                                       |                       |            |                   |         |         |
| Inputs from technosphere: electricity/heat                                | Amount                | Unit       | Dis SI M Mi       |         | Comment |
| Add                                                                       |                       |            |                   |         |         |
| Outputs                                                                   |                       |            |                   |         |         |
| Materials and/or waste types separated from waste stream                  | Material / Waste type | Percentage | Comment           |         |         |
| Add                                                                       |                       |            |                   |         |         |
| Waste streams remaining after separation                                  |                       | Percentage | Comment           |         |         |
| Waste paperboard (RoW)  treatment of, municipal incineration   Cut-off, S |                       | 7.6 %      | see Table 8       |         |         |
| Paper (waste treatment) (GLO)  recycling of paper   Cut-off, S            |                       | 80.8 %     | Idem              |         |         |
| Waste paperboard (RoW)  treatment of, sanitary landfill   Cut-off, S      |                       | 11.6 %     | Idem              |         |         |

Table S27. Waste scenario of wooden pallet wastes (PALW).

| Products                                                                                             |        |      |          |                       |      |            |     |             |     |         |         |
|------------------------------------------------------------------------------------------------------|--------|------|----------|-----------------------|------|------------|-----|-------------|-----|---------|---------|
| Waste specification                                                                                  | Amount | Unit | Category | Comment               |      |            |     |             |     |         |         |
| FP - 12 Pallet Waste Scenarios                                                                       | 1      | kg   | Others   |                       |      |            |     |             |     |         |         |
| Inputs                                                                                               |        |      |          |                       |      |            |     |             |     |         |         |
| Inputs from technosphere: materials/fuels                                                            |        |      |          | Amount                | Unit | Distrit    | SD2 | ε           | Min | Max     | Comment |
| Add                                                                                                  |        |      |          |                       |      |            |     |             |     |         |         |
| Inputs from technosphere: electricity/heat                                                           |        |      |          | Amount                | Unit | Dis        | SI  | M           | Mi  | Comment |         |
| Add                                                                                                  |        |      |          |                       |      |            |     |             |     |         |         |
| Outputs                                                                                              |        |      |          |                       |      |            |     |             |     |         |         |
| Materials and/or waste types separated from waste stream                                             |        |      |          | Material / Waste type |      | Percentage |     | Comment     |     |         |         |
| Add                                                                                                  |        |      |          |                       |      |            |     |             |     |         |         |
| Waste streams remaining after separation                                                             |        |      |          |                       |      | Percentage |     | Comment     |     |         |         |
| Waste wood, untreated {RoW}  treatment of waste wood, untreated, municipal incineration   Cut-off, S |        |      |          |                       |      | 2.1 %      |     | see Table 8 |     |         |         |
| Waste wood, untreated {IT}  market for waste wood, untreated   Cut-off, S                            |        |      |          |                       |      | 63.1 %     |     | Idem        |     |         |         |
| Waste wood, untreated {RoW}  treatment of, sanitary landfill   Cut-off, S                            |        |      |          |                       |      | 34.8 %     |     | Idem        |     |         |         |



**Table S28. End-of-life of primary packaging material wastes (EoL-1pack).**

| Name                          | Status   | Comment |
|-------------------------------|----------|---------|
| FP - 20 EoL Primary Packaging | Finished |         |

  

| Referring to assembly                | Amount | Unit | Comment |
|--------------------------------------|--------|------|---------|
| FP- 13 Assembly of Primary Packaging | 1      | p    |         |

  

| Processes                                                                                           | Amount               | Unit | Distrib | SD2 or 2S | Min | Max | Comment                                                                       |
|-----------------------------------------------------------------------------------------------------|----------------------|------|---------|-----------|-----|-----|-------------------------------------------------------------------------------|
| Transport, freight, lorry 7.5-16 metric ton, EURO5 (RoW)  transport, freight, lorry 7.5-16 metric t | 16.7/1000*50 = 0.835 | kgkm |         |           |     |     | TR Plastic and Paper wastes from FPFG, CH to - Waste Collection Centre: 50 km |

  

| Add                                    |            |
|----------------------------------------|------------|
| Waste scenarios                        | Percentage |
| FP - 10 Plastic Waste Scenarios        | 94.03 %    |
| FP- Paperboard Waste Disposal Scenario | 5.97 %     |

  

| Comment |
|---------|
|         |
|         |

**Table S29. End-of-life of secondary packaging material wastes (EoL-2pack).**

| Name                            | Status | Comment |
|---------------------------------|--------|---------|
| FP - 21 EoL Secondary Packaging | None   |         |

  

| Referring to assembly                  | Amount | Unit | Comment |
|----------------------------------------|--------|------|---------|
| FP- 14 Assembly of Secondary Packaging | 1      | p    |         |

  

| Processes                                                                                           | Amount             | Unit | Distrib | SD2 or 2S | Min | Max | Comment                                                                            |
|-----------------------------------------------------------------------------------------------------|--------------------|------|---------|-----------|-----|-----|------------------------------------------------------------------------------------|
| Transport, freight, lorry 7.5-16 metric ton, EURO5 (RoW)  transport, freight, lorry 7.5-16 metric t | 569/1000*50 = 28.4 | kgkm |         |           |     |     | TR Paper&Cardboard and plastic waste from DC to waste collection center WCC: 50 km |

  

| Add                                     |            |
|-----------------------------------------|------------|
| Waste scenarios                         | Percentage |
| FP - 10 Plastic Waste Scenarios         | 1.23 %     |
| FP - 11 Paper&Cardboard Waste Scenarios | 98.77 %    |

  

| Comment |
|---------|
|         |
|         |



**Table S30.** End-of-life of tertiary packaging material wastes (EoL-3pack).

|                                       |  |        |          |         |         |  |  |  |  |
|---------------------------------------|--|--------|----------|---------|---------|--|--|--|--|
| Name                                  |  |        | Status   |         | Comment |  |  |  |  |
| FP - 22 EoL Tertiary Packaging        |  |        | Finished |         |         |  |  |  |  |
| Referring to assembly                 |  | Amount | Unit     | Comment |         |  |  |  |  |
| FP- 15 Assembly of Tertiary Packaging |  | 1      | p        |         |         |  |  |  |  |

  

|                                                                                                     |  |                     |      |         |           |     |     |                                                                                         |
|-----------------------------------------------------------------------------------------------------|--|---------------------|------|---------|-----------|-----|-----|-----------------------------------------------------------------------------------------|
| Processes                                                                                           |  | Amount              | Unit | Distrib | SD2 or 25 | Min | Max | Comment                                                                                 |
| Transport, freight, lorry 7.5-16 metric ton, EURO5 (RoW)  transport, freight, lorry 7.5-16 metric t |  | 22*.998*100 = 2.2E3 | kgkm |         |           |     |     | TR Reusable Pallets from DCs to EPAL Pallet managing Center (EPCM) Pomezia (RM): 100 km |
| Transport, freight, lorry 7.5-16 metric ton, EURO5 (RoW)  transport, freight, lorry 7.5-16 metric t |  | 22*.002*50 = 2.2    | tkm  |         |           |     |     | TR Broken Palles from DCs to EPCM: 50 km                                                |
| Add                                                                                                 |  |                     |      |         |           |     |     |                                                                                         |

  

|                                |  |            |         |  |
|--------------------------------|--|------------|---------|--|
| Waste scenarios                |  | Percentage | Comment |  |
| FP - 12 Pallet Waste Scenarios |  | 0.2 %      | D       |  |
| Add                            |  |            |         |  |
| Disassemblies                  |  | Percentage | Comment |  |
| Add                            |  |            |         |  |
| Reuses                         |  | Percentage | Comment |  |
| FP - 24 Pallet reuse           |  | 99.8 %     |         |  |

**Table S31.** End-of-life scenario for the primary, secondary and tertiary packaging material wastes, excluding wooden pallets (EoL-1-3pack).

|                                          |  |        |          |         |                            |  |  |  |  |
|------------------------------------------|--|--------|----------|---------|----------------------------|--|--|--|--|
| Name                                     |  |        | Status   |         | Comment                    |  |  |  |  |
| FP - 23 EoL I, II & III Packaging        |  |        | Finished |         | Not including wood pallets |  |  |  |  |
| Referring to assembly                    |  | Amount | Unit     | Comment |                            |  |  |  |  |
| FP - 17 Assembly of I, II & III packages |  | 1      | p        |         |                            |  |  |  |  |

  

|                                                                                                     |  |                    |      |       |           |     |     |                                                    |
|-----------------------------------------------------------------------------------------------------|--|--------------------|------|-------|-----------|-----|-----|----------------------------------------------------|
| Processes                                                                                           |  | Amount             | Unit | Distr | SD2 or 25 | Min | Max | Comment                                            |
| Transport, freight, lorry 7.5-16 metric ton, EURO5 (RoW)  transport, freight, lorry 7.5-16 metric t |  | 31.485*50 = 1.57E3 | kgkm |       |           |     |     | TR Paper and plastic wastes from DCs to WCC: 50 km |
| Add                                                                                                 |  |                    |      |       |           |     |     |                                                    |

  

|                                         |  |            |         |  |
|-----------------------------------------|--|------------|---------|--|
| Waste scenarios                         |  | Percentage | Comment |  |
| FP - 10 Plastic Waste Scenarios         |  | 27.06 %    |         |  |
| FP - 11 Paper&Cardboard Waste Scenarios |  | 72.94 %    |         |  |

**Table S32.** Reuse phase of the wooden pallet (Pallet reuse).

|                                       |  |          |      |         |  |
|---------------------------------------|--|----------|------|---------|--|
| Name                                  |  | Status   |      | Comment |  |
| FP - 24 Pallet reuse                  |  | Finished |      |         |  |
| Referring to assembly                 |  | Amount   | Unit | Comment |  |
| FP- 15 Assembly of Tertiary Packaging |  | 1        | p    |         |  |

**Table S33.** Life cycle of HABWF fresh pasta (LC-FP).

|                                 |  |          |      |              |            |     |     |                |
|---------------------------------|--|----------|------|--------------|------------|-----|-----|----------------|
| Name                            |  | Status   |      | Comment      |            |     |     |                |
| FP-Life Cycle of Fresh Pasta    |  | Finished |      |              |            |     |     |                |
| Assembly                        |  | Amount   | Unit | Distribution | SD2 or 2SD | Min | Max | Comment        |
| FP - 18 Assembly of Fresh Pasta |  | 2        | p    | Undefined    |            |     |     | Two 500-g bags |

  

|                                                                                                   |  |                           |      |       |            |     |     |                                                    |
|---------------------------------------------------------------------------------------------------|--|---------------------------|------|-------|------------|-----|-----|----------------------------------------------------|
| Processes                                                                                         |  | Amount                    | Unit | Distr | SD2 or 2SD | Min | Max | Comment                                            |
| Transport, freight, lorry with refrigeration machine, 7.5-16 ton, EURO5, R134a refrigerant, freez |  | 293.48/240*.5*2*100 = 122 | kgkm |       |            |     |     | TR Palletized fresh pasta from Rome to DCs: 100 km |
| FP- 19 Use Phase                                                                                  |  | 1                         | kg   | Und   |            |     |     |                                                    |
| Add                                                                                               |  |                           |      |       |            |     |     |                                                    |

  

|                         |  |         |  |
|-------------------------|--|---------|--|
| Waste/Disposal scenario |  | Comment |  |
|                         |  |         |  |

  

|                                          |  |                 |              |            |     |     |         |
|------------------------------------------|--|-----------------|--------------|------------|-----|-----|---------|
| Additional life cycles                   |  | Number          | Distribution | SD2 or 2SD | Min | Max | Comment |
| FP - Life Cycle of I, II & III packaging |  | 1/240 = 0.00417 |              |            |     |     |         |

**Table S34.** Life cycle of the primary, secondary, and tertiary packaging materials (LC-1-3pack).

|                                          |  |          |  |         |  |  |  |
|------------------------------------------|--|----------|--|---------|--|--|--|
| Name                                     |  | Status   |  | Comment |  |  |  |
| FP - Life Cycle of I, II & III packaging |  | Finished |  |         |  |  |  |

| Assembly                                 | Amount | Unit | Distribution | SD2 or 2SD | Min | Max | Comment |
|------------------------------------------|--------|------|--------------|------------|-----|-----|---------|
| FP - 17 Assembly of I, II & III packages | 1      | p    | Undefined    |            |     |     |         |

  

| Processes | Amount | Unit | Distr | SD2 or 2SD | Min | Max | Comment |
|-----------|--------|------|-------|------------|-----|-----|---------|
| Add       |        |      |       |            |     |     |         |

|                                   |         |
|-----------------------------------|---------|
| Waste/Disposal scenario           | Comment |
| FP - 23 EoL I, II & III Packaging |         |

  

| Additional life cycles         | Number | Distribution | SD2 or 2SD | Min | Max | Comment |
|--------------------------------|--------|--------------|------------|-----|-----|---------|
| FP-Life Cycle of Wooden Pallet | 1      | Undefined    |            |     |     |         |

**Table S35.** Life cycle of the wooden pallet (LC-3pack).

|                                |  |        |  |         |  |  |  |
|--------------------------------|--|--------|--|---------|--|--|--|
| Name                           |  | Status |  | Comment |  |  |  |
| FP-Life Cycle of Wooden Pallet |  | None   |  |         |  |  |  |

| Assembly                              | Amount | Unit | Distribution | SD2 or 2SD | Min | Max | Comment |
|---------------------------------------|--------|------|--------------|------------|-----|-----|---------|
| FP- 15 Assembly of Tertiary Packaging | 1      | p    | Undefined    |            |     |     |         |

  

| Processes | Amount | Unit | Distribution | SD2 or 2SD | Min | Max |
|-----------|--------|------|--------------|------------|-----|-----|
| Add       |        |      |              |            |     |     |

|                                |         |
|--------------------------------|---------|
| Waste/Disposal scenario        | Comment |
| FP - 22 EoL Tertiary Packaging |         |

**Table S36.** Inventory associated with the cultivation phase of a typical bread wheat in Central Italy.

| Products                                                                                                         |                      |                              |              |              |            |                     |         |                                                      |  |
|------------------------------------------------------------------------------------------------------------------|----------------------|------------------------------|--------------|--------------|------------|---------------------|---------|------------------------------------------------------|--|
| Outputs to technosphere: Products and co-products                                                                | Amount               | Unit                         | Quantity     | Allocation % | Waste type | Category            | Comment |                                                      |  |
| FP GT -1 Soft Wheat Grain                                                                                        | CropYield = 7.26E3   | kg                           | Mass         | 92.5 %       | Biopolymer | A...\Transformation |         |                                                      |  |
| STRAW SW                                                                                                         | STRAW/SSSTRAW = 12.4 | ton                          | Mass         | 7.5 %        | Biopolymer | A...\Transformation |         |                                                      |  |
| Add                                                                                                              |                      |                              |              |              |            |                     |         |                                                      |  |
| Outputs to technosphere: Avoided products                                                                        | Amount               | Unit                         | Distribution | SD2 or 2SD   | Min        | Max                 | Comment |                                                      |  |
| Add                                                                                                              |                      |                              |              |              |            |                     |         |                                                      |  |
| Inputs                                                                                                           |                      |                              |              |              |            |                     |         |                                                      |  |
| Inputs from nature                                                                                               | Sub-compartment      | Amount                       | Unit         | Distribution | SD2 or 2SD | Min                 | Max     | Comment                                              |  |
| Occupation, annual crop, IT                                                                                      |                      | AREA = 1                     | ha a         |              |            |                     |         |                                                      |  |
| Add                                                                                                              |                      |                              |              |              |            |                     |         |                                                      |  |
| Inputs from technosphere: materials/fuels                                                                        |                      | Amount                       | Unit         | Distrib      | SD2 or 2SD | Min                 | Max     | Comment                                              |  |
| Urea (RER)  urea production   Cut-off, S                                                                         |                      | UREA*AREA = 150              | kg           |              |            |                     |         | See Table 1                                          |  |
| Diammonium phosphate (RER)  diammonium phosphate production   Cut-off, S                                         |                      | FOSFBIAM*AREA = 200          | kg           |              |            |                     |         | "                                                    |  |
| Ammonium nitrate (RER)  ammonium nitrate production   Cut-off, S                                                 |                      | NITRAMM*AREA = 150           | kg           |              |            |                     |         | "                                                    |  |
| Pesticide, unspecified (RER)  production   Cut-off, U                                                            |                      | 1.8*AREA = 1.8               | kg           |              |            |                     |         | Fungicide (1 L/ha) + Herbicide (0.8 L/ha)            |  |
| Diesel (Europe without Switzerland)  market for   Cut-off, S                                                     |                      | 70*AREA = 70                 | kg           |              |            |                     |         | See Table 1                                          |  |
| Lubricating oil (RER)  market for lubricating oil   Cut-off, S                                                   |                      | 0.2*AREA = 0.2               | kg           |              |            |                     |         | "                                                    |  |
| Wheat seed, for sowing (GLO)  production   Cut-off, S                                                            |                      | Seed*AREA = 250              | kg           |              |            |                     |         | "                                                    |  |
| Inputs from technosphere: electricity/heat                                                                       |                      | Amount                       | Unit         | Dis          | SI         | M                   | Me      | Comment                                              |  |
| Transport, freight, lorry 3.5-7.5 metric ton, EUROS (RoW)  transport, freight, lorry 3.5-7.5 metric ton, EUROS   |                      | Seed*AREA*55 = 1.38E4        | kgkm         |              |            |                     |         | Transport seeds  VT-Anguillara Sabazia: 55 km        |  |
| Transport, freight, lorry 7.5-16 metric ton, EUROS (RER)  transport, freight, lorry 7.5-16 metric ton, EUROS   C |                      | (UREA+FOSFBIAM+NITRAMM)*AREA | kgkm         |              |            |                     |         | TR fertilizers Varie-Anguillara Sabazia: 100 km      |  |
| Transport, freight, light commercial vehicle (Europe without Switzerland)  market for transport, freight, light  |                      | (1.8+70+0.2)*AREA*25 = 1.8E3 | kgkm         |              |            |                     |         | TR pest+diesel fuel+Lubr oil Varie-Angu. Sab.: 25 km |  |
| Transport, freight, lorry 7.5-16 metric ton, EUROS (RER)  transport, freight, lorry 7.5-16 metric ton, EUROS   C |                      | STRAW/SSSTRAW*50 = 619       | tkm          |              |            |                     |         | TR Paglia Ang Sab-Varie: 50 km                       |  |
| Add                                                                                                              |                      |                              |              |              |            |                     |         |                                                      |  |
| Outputs                                                                                                          |                      |                              |              |              |            |                     |         |                                                      |  |
| Emissions to air                                                                                                 | Sub-compartment      | Amount                       | Unit         | Distrib      | SD2 or 2SD | Min                 | Max     | Comment                                              |  |
| Dinitrogen monoxide                                                                                              | low. pop., long-term | FN2OTOT = 3.82               | kg           |              |            |                     |         |                                                      |  |
| Nitrogen monoxide, IT                                                                                            | low. pop., long-term | NOA = 4.59                   | kg           |              |            |                     |         |                                                      |  |
| Carbon dioxide, fossil                                                                                           | low. pop., long-term | CO2U = 55                    | kg           |              |            |                     |         |                                                      |  |
| Add                                                                                                              |                      |                              |              |              |            |                     |         |                                                      |  |
| Emissions to water                                                                                               | Sub-compartment      | Amount                       | Unit         | Distributio  | SD2 or 2SD | Min                 | Max     | Comment                                              |  |
| Nitrate, IT                                                                                                      | groundwater, long    | NITRL = 43.1                 | kg           |              |            |                     |         |                                                      |  |
| Phosphorus, IT                                                                                                   | groundwater, long    | PLEACH = 2.01                | kg           |              |            |                     |         |                                                      |  |

**Table S37.** Inventory associated with the milling phase of common wheat grains cultivated in Central Italy.

| Products                                                                                                           |                    |                              |              |              |            |                   |                                        |                                                    |  |
|--------------------------------------------------------------------------------------------------------------------|--------------------|------------------------------|--------------|--------------|------------|-------------------|----------------------------------------|----------------------------------------------------|--|
| Outputs to technosphere: Products and co-products                                                                  | Amount             | Unit                         | Quantity     | Allocation % | Waste type | Category          | Comment                                |                                                    |  |
| FP GT - 2 Bread Wheat Flour, at industrial mill                                                                    | HAWG*YHAWF = 5.3E3 | kg                           | Mass         | 84 %         | Biopolymer | Food\Cereal produ | Economic allocation factors (UNAFTA, 2 |                                                    |  |
| FP GT -Pelletized Middlings                                                                                        | HAWG*YWFP = 2.21E3 | kg                           | Mass         | 16 %         | Biopolymer | Food\Cereal produ |                                        |                                                    |  |
| FP GT -ISS                                                                                                         | HAWG*YISS = 3.63   | kg                           | Mass         | 0 %          | Others     | Food\Cereal produ | Impurities                             |                                                    |  |
| Add                                                                                                                |                    |                              |              |              |            |                   |                                        |                                                    |  |
| Outputs to technosphere: Avoided products                                                                          | Amount             | Unit                         | Distribution | SD2 or 2SD   | Min        | Max               | Comment                                |                                                    |  |
| Add                                                                                                                |                    |                              |              |              |            |                   |                                        |                                                    |  |
| Inputs                                                                                                             |                    |                              |              |              |            |                   |                                        |                                                    |  |
| Inputs from nature                                                                                                 | Sub-compartment    | Amount                       | Unit         | Distribution | SD2 or 2SD | Min               | Max                                    | Comment                                            |  |
| Add                                                                                                                |                    |                              |              |              |            |                   |                                        |                                                    |  |
| Inputs from technosphere: materials/fuels                                                                          |                    | Amount                       | Unit         | Distrit      | SD2        | Min               | Max                                    | Comment                                            |  |
| FP GT -1 Soft Wheat Grain                                                                                          |                    | HAWG = 7.26E3                | kg           |              |            |                   |                                        | MP                                                 |  |
| Tap water (Europe without Switzerland)  tap water production, underground water without treatment                  |                    | HAWG*YMO = 238               | kg           |              |            |                   |                                        |                                                    |  |
| FP-1 bis paper bags x flour                                                                                        |                    | NSF*MSF*(1+SPSAF) = 24.6     | kg           |              |            |                   |                                        |                                                    |  |
| Chlorine, liquid (RER)  chlorine production, liquid   Cut-off, S                                                   |                    | DETER = 0.0123               | kg           |              |            |                   |                                        |                                                    |  |
| Lubricating oil (RER)  market for lubricating oil   Cut-off, S                                                     |                    | OLUBR = 0.0152               | kg           |              |            |                   |                                        |                                                    |  |
| Add                                                                                                                |                    |                              |              |              |            |                   |                                        |                                                    |  |
| Inputs from technosphere: electricity/heat                                                                         |                    | Amount                       | Unit         | Dis          | SI         | M                 | Mi                                     | Comment                                            |  |
| Electricity, medium voltage (IT)  electricity voltage transformation from high to medium voltage   Cut-off, S      |                    | 147*HAWG/1000 = 1.07E3       | kWh          |              |            |                   |                                        | 147 kWh/Mg                                         |  |
| Transport, freight, lorry 7.5-16 metric ton, EURO5 (RER)  transport, freight, lorry 7.5-16 metric ton, EURO5   C   |                    | HAWG*20 = 1.45E5             | kgkm         |              |            |                   |                                        | TR HAWF grains Anguillara Sabazia-Bracciano: 20 km |  |
| Transport, freight, lorry 16-32 metric ton, EURO5 (RER)  transport, freight, lorry 16-32 metric ton, EURO5   Cu    |                    | NSF*MSF*(1+SSAF)*527 = 1.6E4 | kgkm         |              |            |                   |                                        | TR paper bags Rho (MI)-Spoleto (PG): 527 km        |  |
| Transport, freight, lorry 3.5-7.5 metric ton, EURO5 (RER)  transport, freight, lorry 3.5-7.5 metric ton, EURO5   C |                    | (HAWG*YISS+SSAF)*50 = 194    | kgkm         |              |            |                   |                                        | TR ISS+paper bag waste: 50 km                      |  |
| Transport, freight, lorry 3.5-7.5 metric ton, EURO5 (RER)  transport, freight, lorry 3.5-7.5 metric ton, EURO5   C |                    | DETER/1000*112 = 0.00138     | kgkm         |              |            |                   |                                        | TR Detergent- Nera Montoro (TR) -Bracciano: 112 km |  |
| Transport, freight, lorry 3.5-7.5 metric ton, EURO5 (RER)  transport, freight, lorry 3.5-7.5 metric ton, EURO5   C |                    | OLUBR/1000*133 = 0.00203     | kgkm         |              |            |                   |                                        | TR Lubricating oil -Terni-Bracciano: 133 km        |  |
| Transport, freight, lorry 7.5-16 metric ton, EURO5 (RER)  transport, freight, lorry 7.5-16 metric ton, EURO5   C   |                    | HAWG*YWFP/1000*50 = 111      | tkm          |              |            |                   |                                        | TR Milling by-products: MFG-CF: 50 km              |  |
| Add                                                                                                                |                    |                              |              |              |            |                   |                                        |                                                    |  |
| Outputs                                                                                                            |                    |                              |              |              |            |                   |                                        |                                                    |  |
| Emissions to air                                                                                                   | Sub-compartment    | Amount                       | Unit         | Distrit      | SD2 or     | Min               | Max                                    | Comment                                            |  |
| Water                                                                                                              | low. pop.          | 44.6                         | kg           | Unde         |            |                   |                                        | see Table 3                                        |  |
| Outputs to technosphere: Waste and emissions to treatment                                                          |                    | Amount                       | Unit         | Dis          | SD         | Min               | Mi                                     | Comment                                            |  |
| Inert waste, for final disposal (RoW)  treatment of inert waste, inert material landfill   Cut-off, S              |                    | HAWG*YISS = 3.63             | kg           |              |            |                   |                                        |                                                    |  |
| Paper (waste treatment) (GLO)  recycling of paper   Cut-off, S                                                     |                    | SSAF*.808 = 0.197            | kg           |              |            |                   |                                        |                                                    |  |
| Waste paperboard (RoW)  treatment of, sanitary landfill   Cut-off, S                                               |                    | SSAF*.116 = 0.0283           | kg           |              |            |                   |                                        |                                                    |  |
| Waste paperboard (Europe without Switzerland)  treatment of waste paperboard, municipal incineration   Cut-off, S  |                    | SSAF*.076 = 0.0185           | kg           |              |            |                   |                                        |                                                    |  |



**Table S38.** Inventory associated with the fresh pasta production step using type 00 bread wheat flour.

| Products                                                                                                           |                      |                           |              |              |            |                   |                                          |                                                                      |  |
|--------------------------------------------------------------------------------------------------------------------|----------------------|---------------------------|--------------|--------------|------------|-------------------|------------------------------------------|----------------------------------------------------------------------|--|
| Outputs to technosphere: Products and co-products                                                                  | Amount               | Unit                      | Quantity     | Allocation % | Waste type | Category          | Comment                                  |                                                                      |  |
| FPGT- 3 Fresh Pasta from BWF, at packaging                                                                         | PFPACK = 5.98E3      | kg                        | Mass         | 100 %        | Compost    | Food\Cereal produ |                                          |                                                                      |  |
| FPGT-SI-SPP                                                                                                        | ORGW = 117           | kg                        | Mass         | 0 %          | Biopolymer | Food\Cereal produ | scarti impasto+pasta fresca pastorizzata |                                                                      |  |
| Add                                                                                                                |                      |                           |              |              |            |                   |                                          |                                                                      |  |
| Outputs to technosphere: Avoided products                                                                          | Amount               | Unit                      | Distribution | SD2 or 2SD   | Min        | Max               | Comment                                  |                                                                      |  |
| Add                                                                                                                |                      |                           |              |              |            |                   |                                          |                                                                      |  |
| Inputs                                                                                                             |                      |                           |              |              |            |                   |                                          |                                                                      |  |
| Inputs from nature                                                                                                 | Sub-compartment      | Amount                    | Unit         | Distribution | SD2 or 2SD | Min               | Max                                      | Comment                                                              |  |
| Add                                                                                                                |                      |                           |              |              |            |                   |                                          |                                                                      |  |
| Inputs from technosphere: materials/fuels                                                                          |                      | Amount                    | Unit         | Distrit      | SD2 c      | Min               | Max                                      | Comment                                                              |  |
| FP GT - 2 Bread Wheat Flour, at industrial mill                                                                    |                      | HAWF = 5.3E3              | kg           |              |            |                   |                                          |                                                                      |  |
| Tap water {Europe without Switzerland}  market for   Cut-off, S                                                    |                      | HAWF*WFR = 1.32E3         | kg           |              |            |                   |                                          | Acqua per Impasto                                                    |  |
| Water, deionised {Europe without Switzerland}  water production, deionised   Cut-off, S                            |                      | HAWF*YVPAST = 334         | kg           |              |            |                   |                                          | Per produrre vapore per pastorizzare la pasta fresca                 |  |
| Chlorine, liquid {GLO}  production   Cut-off, S                                                                    |                      | DETER = 0.0933            | kg           |              |            |                   |                                          |                                                                      |  |
| Lubricating oil {RER}  market for lubricating oil   Cut-off, S                                                     |                      | OLUBR = 0.176             | kg           |              |            |                   |                                          |                                                                      |  |
| Add                                                                                                                |                      |                           |              |              |            |                   |                                          |                                                                      |  |
| Inputs from technosphere: electricity/heat                                                                         |                      | Amount                    | Unit         | Dis          | SI         | M                 | Mi                                       | Comment                                                              |  |
| Heat, central or small-scale, natural gas {Europe without Switzerland}  heat production, natural gas, at boiler    |                      | HAWF*YPP/1000*78.8 = 479  | kWh          |              |            |                   |                                          |                                                                      |  |
| Electricity, medium voltage {IT}  electricity voltage transformation from high to medium voltage   Cut-off, S      |                      | HAWF*YPP/1000*147.8 = 898 | kWh          |              |            |                   |                                          |                                                                      |  |
| Transport, freight, lorry 7.5-16 metric ton, EURO5 {RER}  transport, freight, lorry 7.5-16 metric ton, EURO5   C   |                      | HAWF*150 = 7.95E5         | kgkm         |              |            |                   |                                          | TR HAWF - Spoleto- Roma: 150 km                                      |  |
| Transport, freight, lorry 3.5-7.5 metric ton, EURO5 {RER}  transport, freight, lorry 3.5-7.5 metric ton, EURO5   C |                      | DETER*83 = 7.75           | kgkm         |              |            |                   |                                          | TR Detergente - Nera Montoro (TR)-RM: 83 km                          |  |
| Transport, freight, lorry 3.5-7.5 metric ton, EURO5 {RER}  transport, freight, lorry 3.5-7.5 metric ton, EURO5   C |                      | OLUBR*103 = 18.2          | kgkm         |              |            |                   |                                          | TR Olio lubrificante -Terni -RM: 103 km                              |  |
| Outputs                                                                                                            |                      |                           |              |              |            |                   |                                          |                                                                      |  |
| Emissions to air                                                                                                   | Sub-compartment      | Amount                    | Unit         | Distil       | SD2 or     | Min               | Max                                      | Comment                                                              |  |
| Water                                                                                                              | low. pop., long-term | HAWF*YVTRAF = 98.6        | kg           |              |            |                   |                                          | Water evaporated alle trafile                                        |  |
| Water                                                                                                              | low. pop., long-term | HAWF*YVASC = 753          | kg           |              |            |                   |                                          | Water evaporated per ridurre al 24% p/p l'umidità della pasta Fresca |  |
| Ethane, pentafluoro-, HFC-125                                                                                      | low. pop., long-term | PFPACK*YFG*.44 = 1.71E3   | mg           |              |            |                   |                                          |                                                                      |  |
| Ethane, 1,1,1,2-tetrafluoro-, HFC-134a                                                                             | low. pop., long-term | PFPACK*YFG*.04 = 156      | mg           |              |            |                   |                                          |                                                                      |  |
| Ethane, 1,1,1-trifluoro-, HFC-143a                                                                                 | low. pop., long-term | PFPACK*YFG*.52 = 2.02E3   | mg           |              |            |                   |                                          |                                                                      |  |
| Outputs to technosphere: Waste and emissions to treatment                                                          |                      | Amount                    | Unit         | Dis          | SD:        | Min               | M:                                       | Comment                                                              |  |
| Wastewater, from residence {RoW}  treatment of, capacity 1.1E10l/year   Cut-off, S                                 |                      | PFPACK/1000*72 = 431      | l            |              |            |                   |                                          | 72 L/Mg of fresh pasta                                               |  |
| Biowaste {RoW}  treatment of biowaste by anaerobic digestion   Cut-off, S                                          |                      | ORGW*.255 = 30            | kg           |              |            |                   |                                          |                                                                      |  |
| Sludge from pulp and paper production {Europe without Switzerland}  treatment of sludge from pulp and paper pro    |                      | ORGW*.31 = 36.4           | kg           |              |            |                   |                                          |                                                                      |  |
| Raw sewage sludge {RoW}  treatment of, municipal incineration   Cut-off, S                                         |                      | ORGW*.18 = 21.1           | kg           |              |            |                   |                                          |                                                                      |  |
| Biowaste {RoW}  treatment of biowaste, industrial composting   Cut-off, S                                          |                      | ORGW*.255 = 30            | kg           |              |            |                   |                                          |                                                                      |  |
